# Supplementary material for: Visible-light-mediated C3-azolylation of imidazo[1,2-a]pyridines with 2-bromoazoles
Source: Royal Society of Chemistry journal article supplement (doi:10.1039/c7ob00883j), 2017-01-01

Electronic Supplementary Information for

**Visible-light-mediated C3-azolylation of imidazo[1,2-*a*]pyridines with  
2-bromoazoles**

Qing Chang, Zhongjie Wu, Lu Yu, Ping Liu and Peipei Sun\*

*College of Chemistry and Materials Science, Jiangsu Provincial Key Laboratory of Material  
Cycle Processes and Pollution Control, Jiangsu Collaborative Innovation Center of Biomedical  
Functional Materials, Nanjing Normal University, Nanjing 210023, China*

*E-mail: sunpeipei@njnu.edu.cn*

1. Copies of  $^1\text{H}$  and  $^{13}\text{C}$  NMR Spectra of the Products.....S2-S32

9.657  
7.933  
7.925  
7.907  
7.897  
7.827  
7.727  
7.719  
7.714  
7.710  
7.703  
7.507  
7.498  
7.491  
7.446  
7.443  
7.429  
7.426  
7.421  
7.407  
7.404  
7.284  
7.245  
7.237  
7.058  
7.055  
7.040  
7.038  
7.023  
7.021

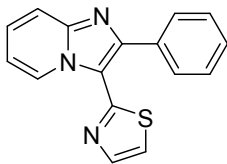

**3a (<sup>1</sup>H NMR)**

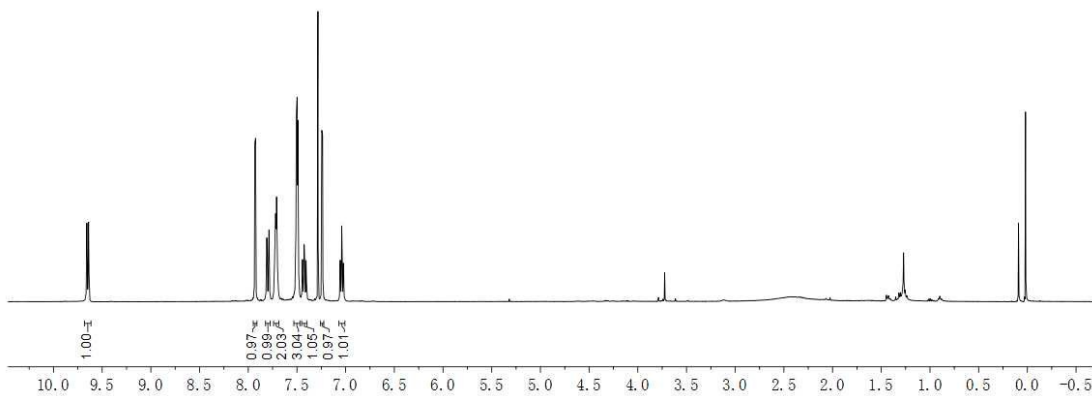

157.608  
147.479  
145.487  
142.314  
133.330  
129.868  
129.202  
128.736  
127.199  
127.020  
118.049  
117.138  
115.791  
113.701

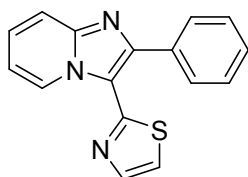

**3a (<sup>13</sup>C NMR)**

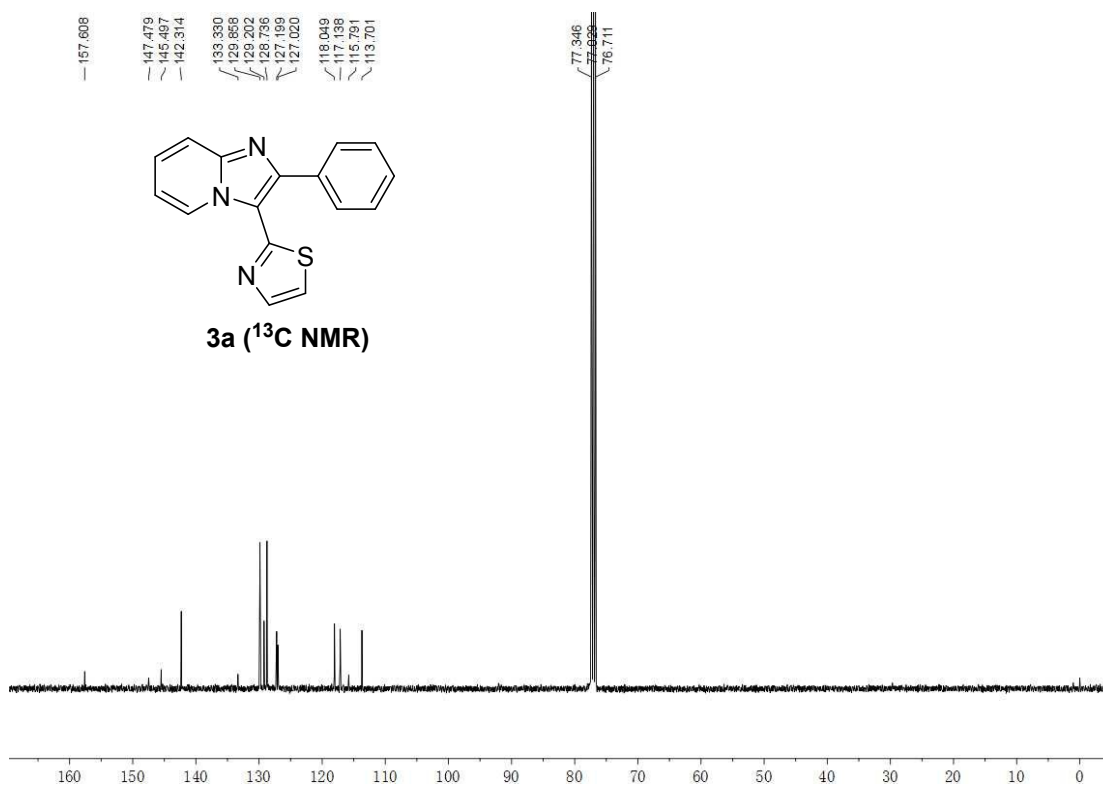

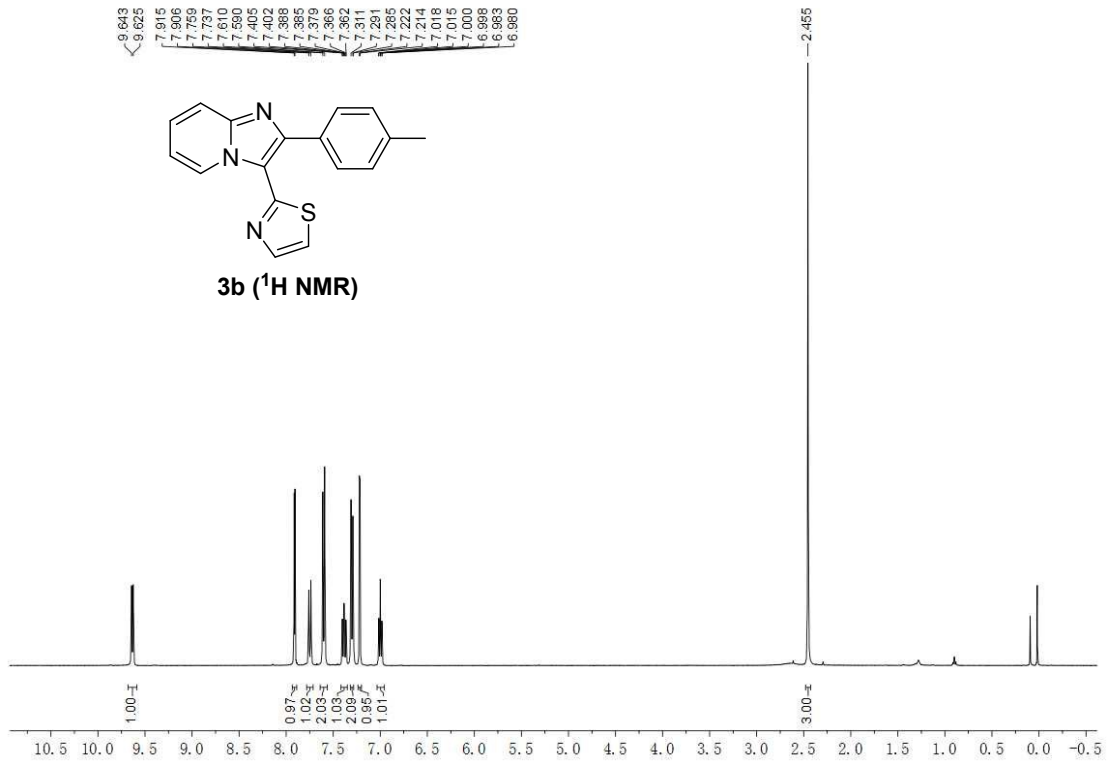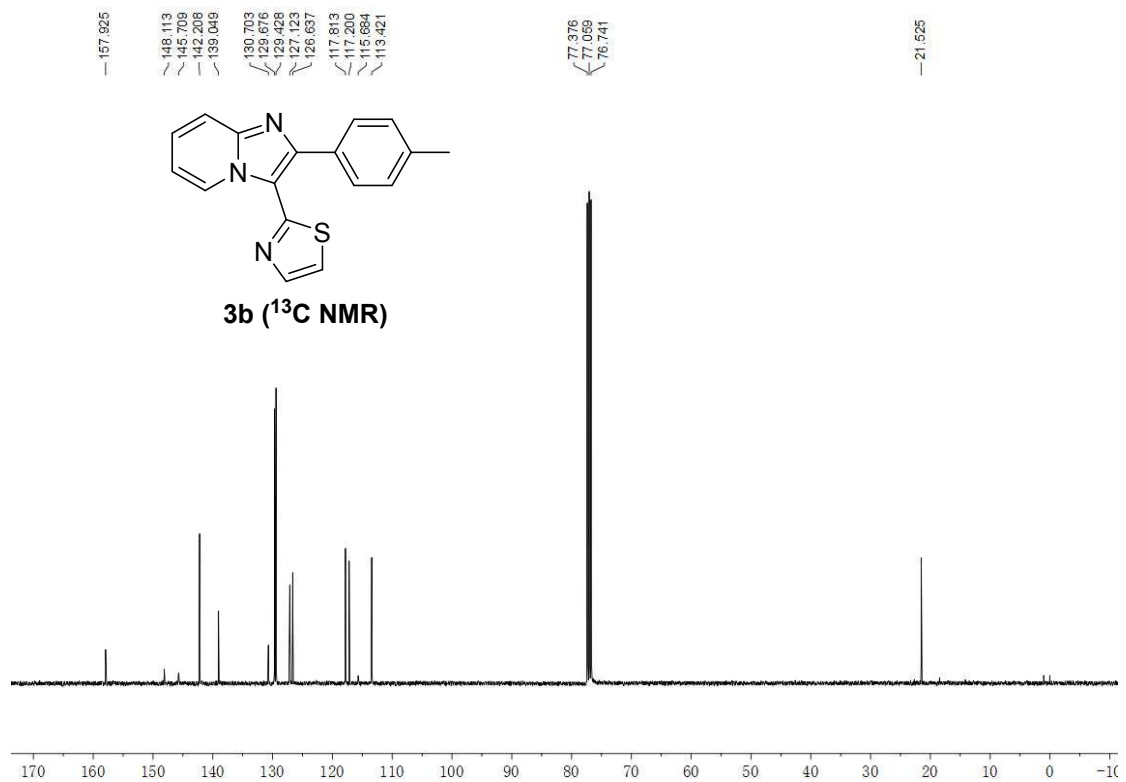

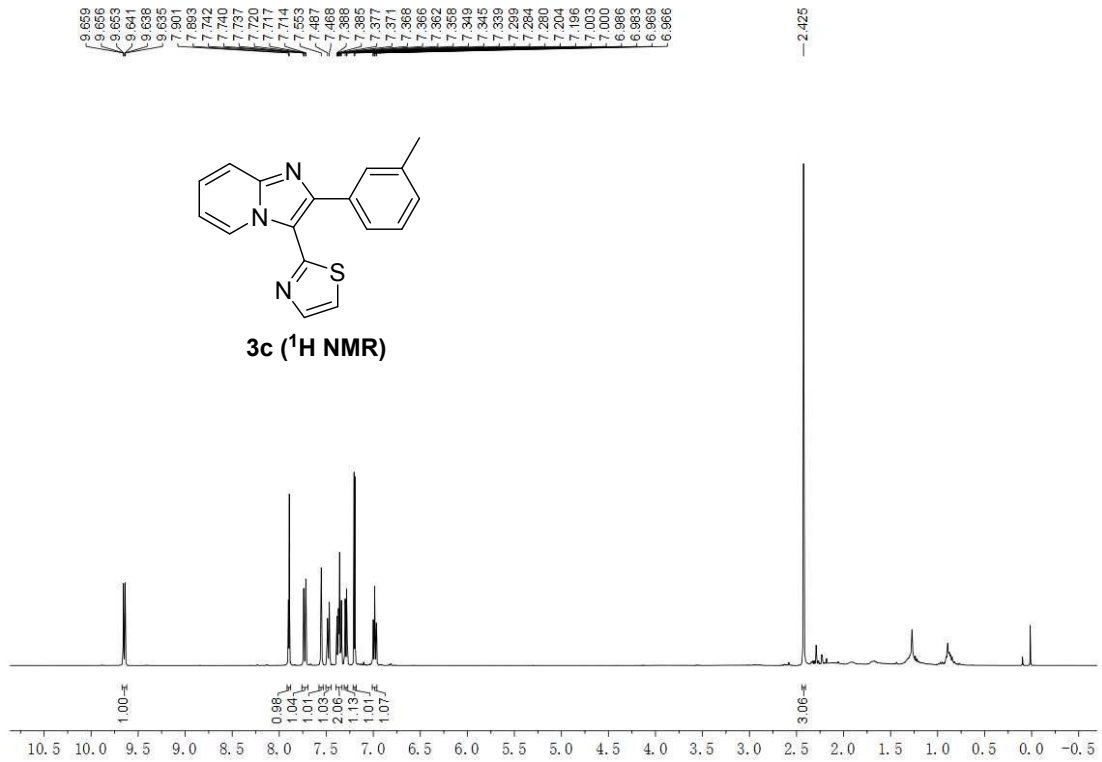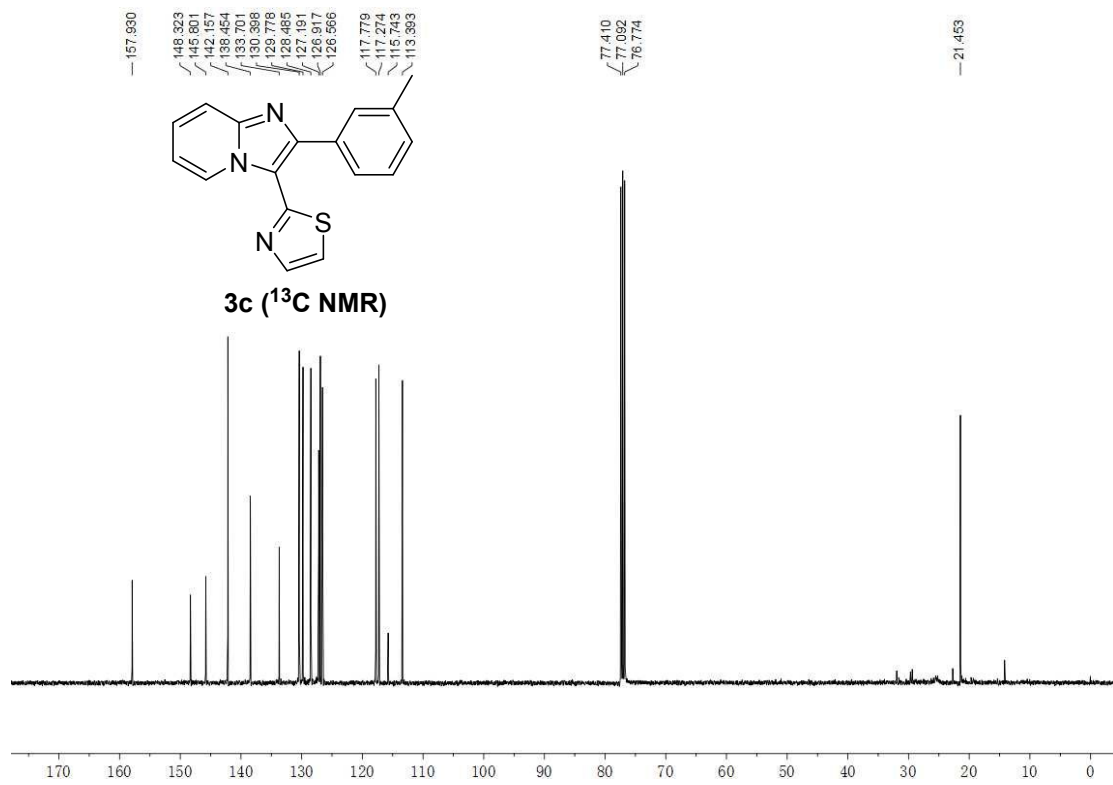

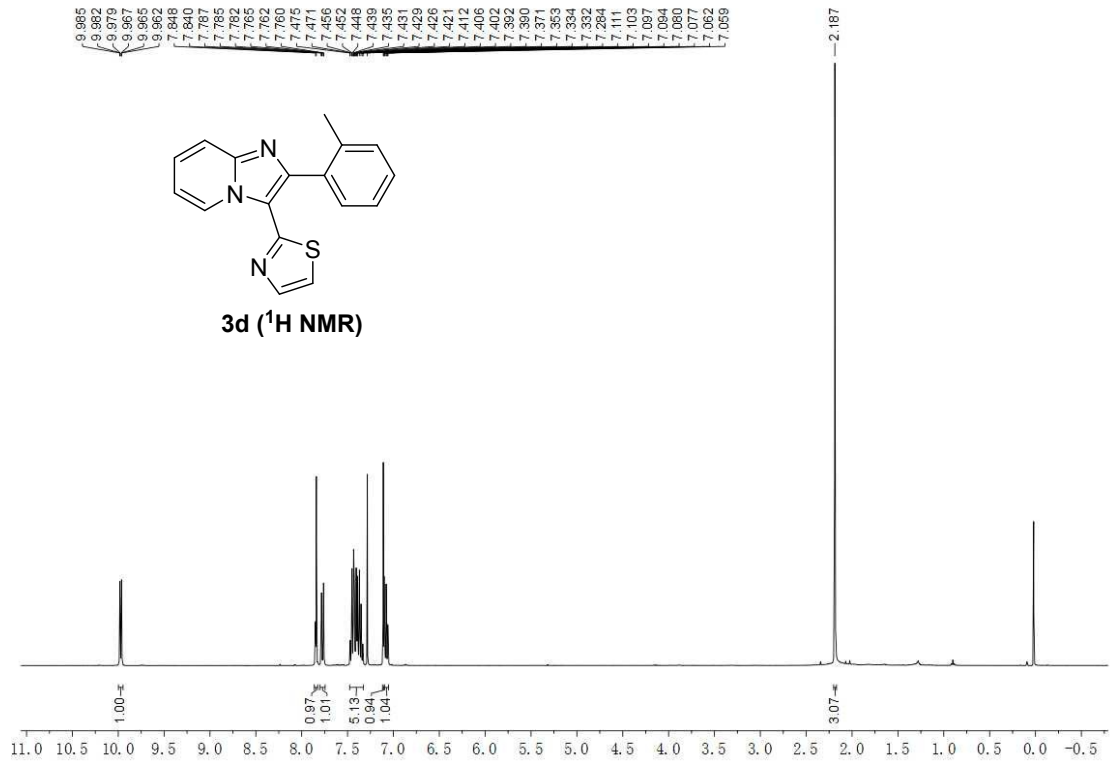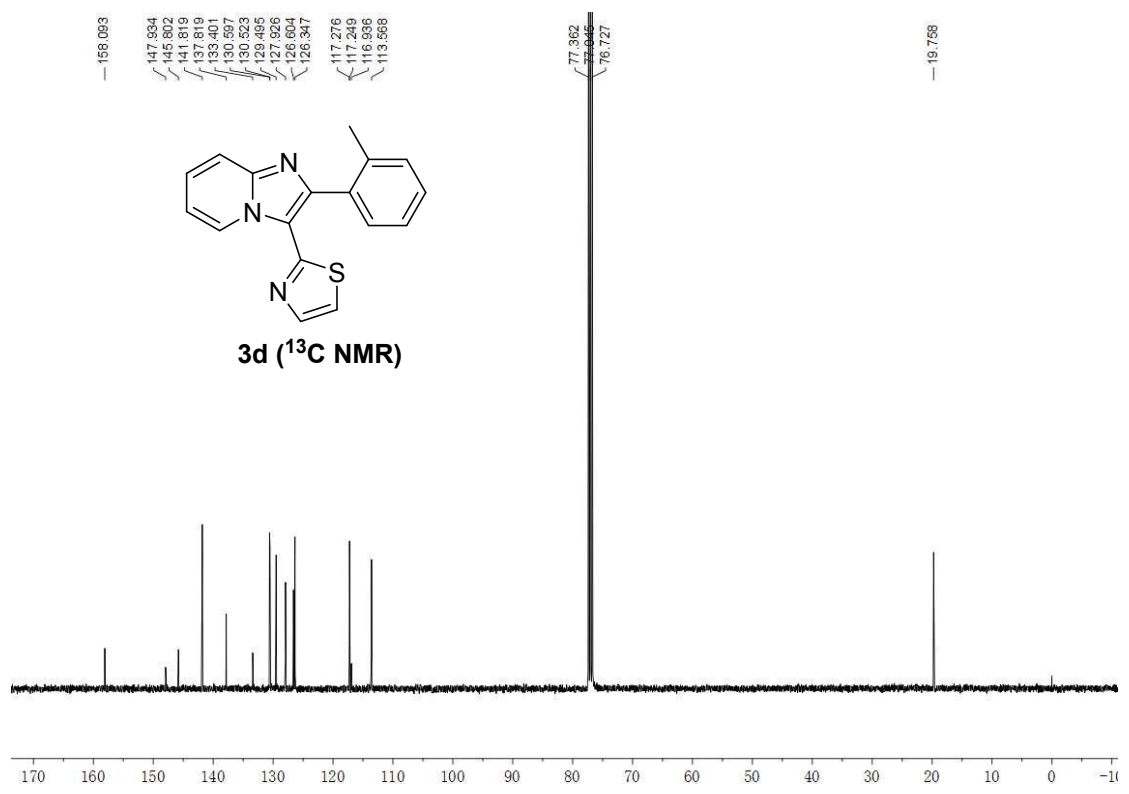

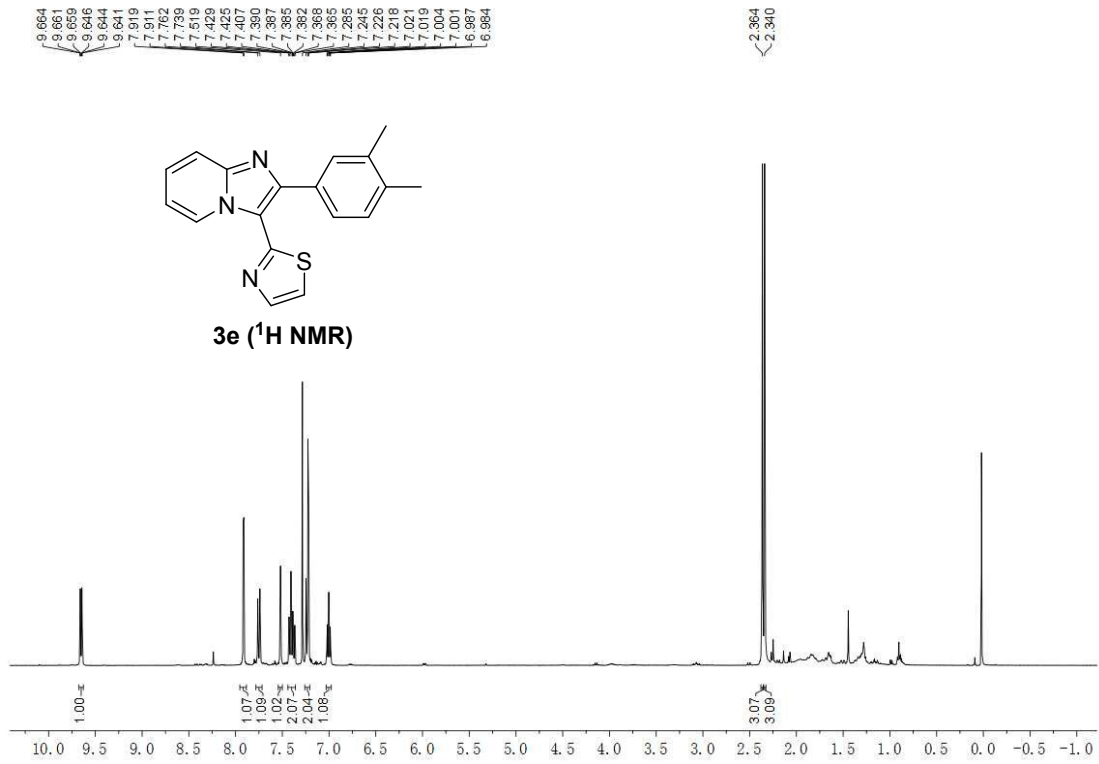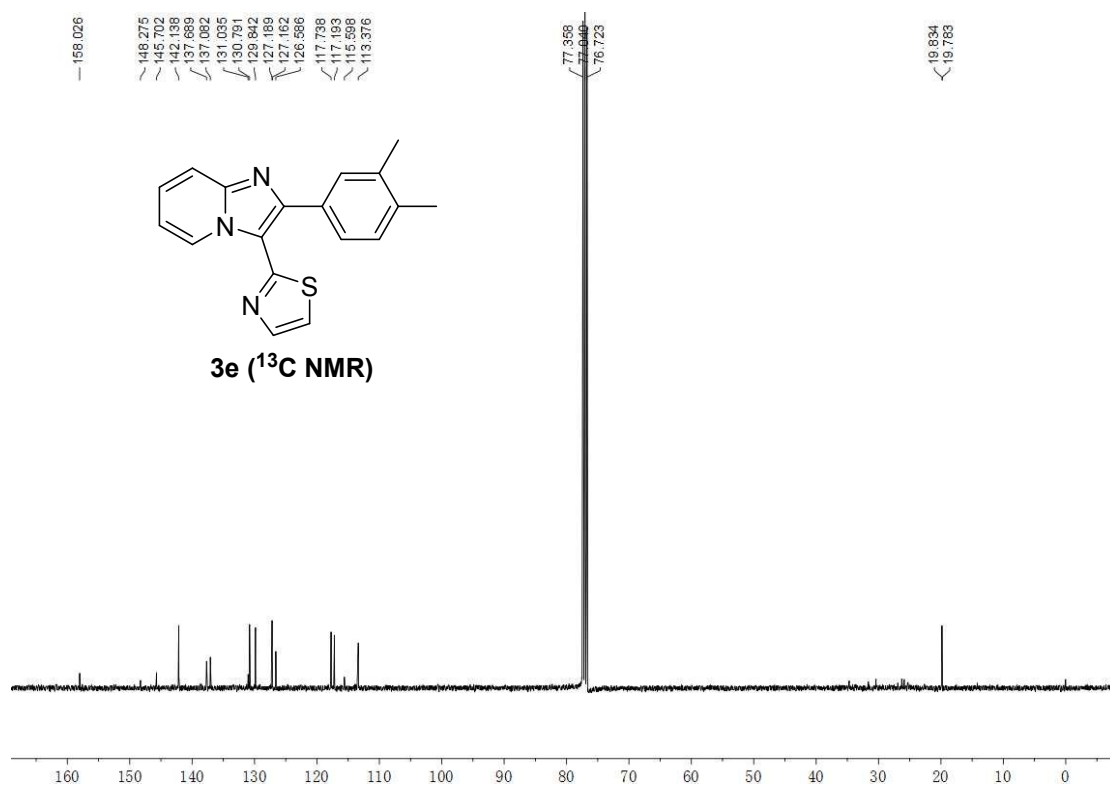

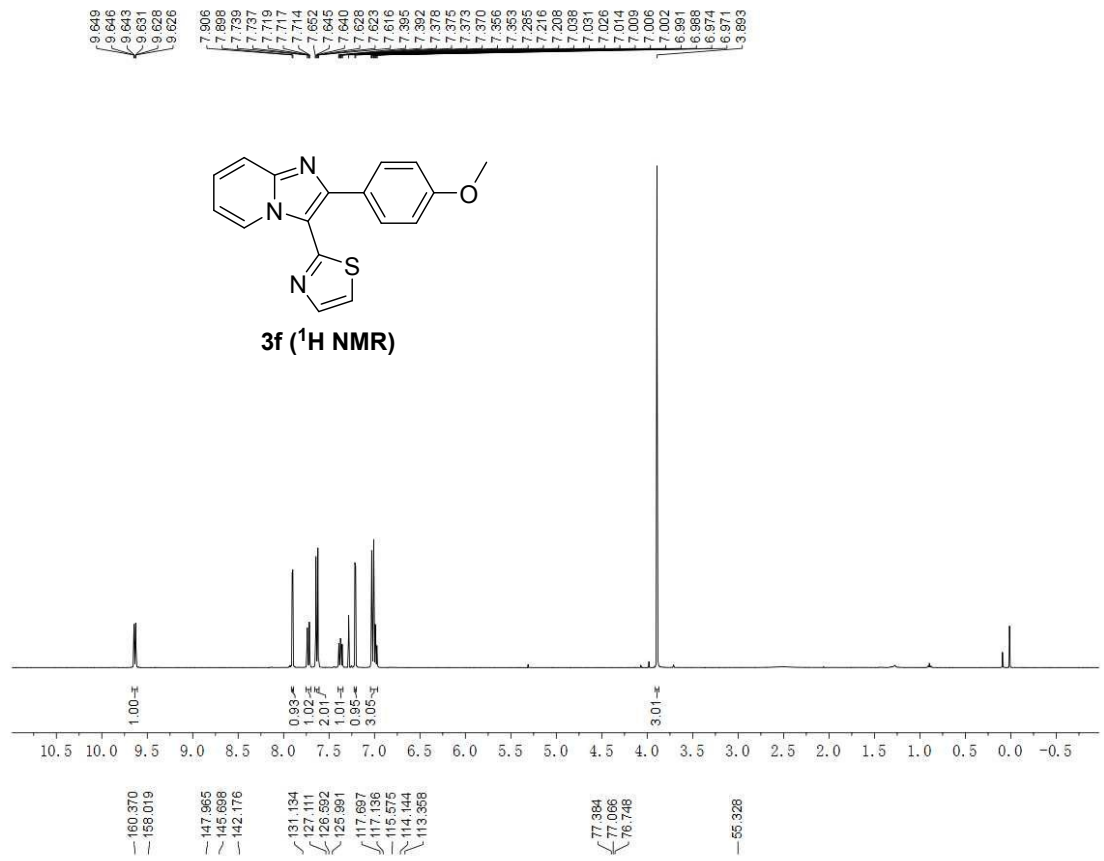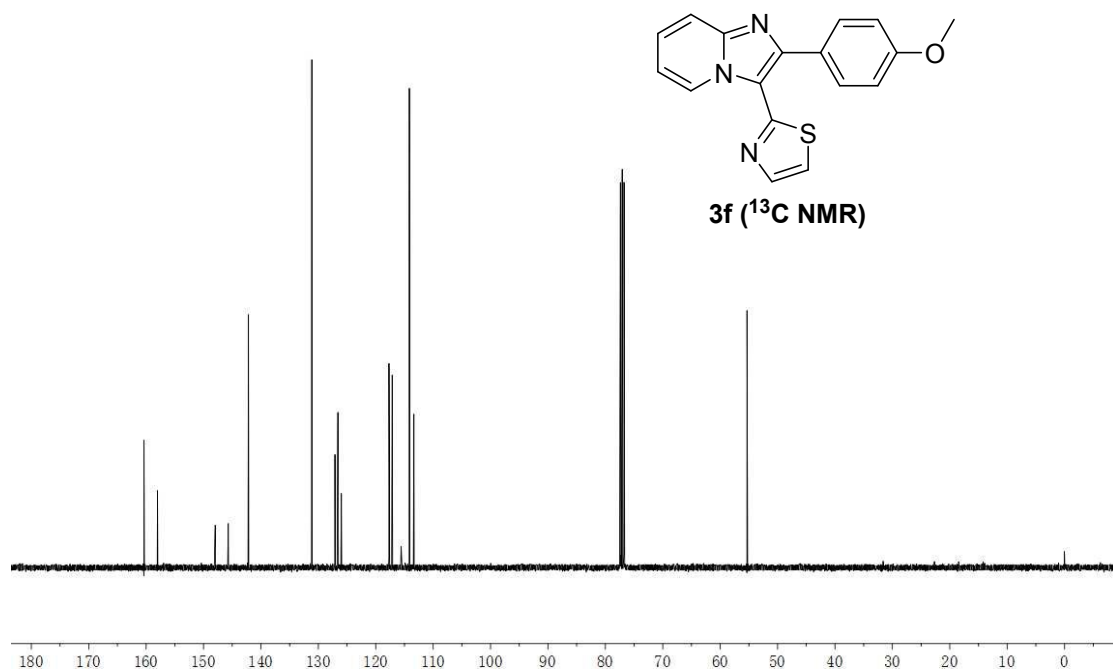

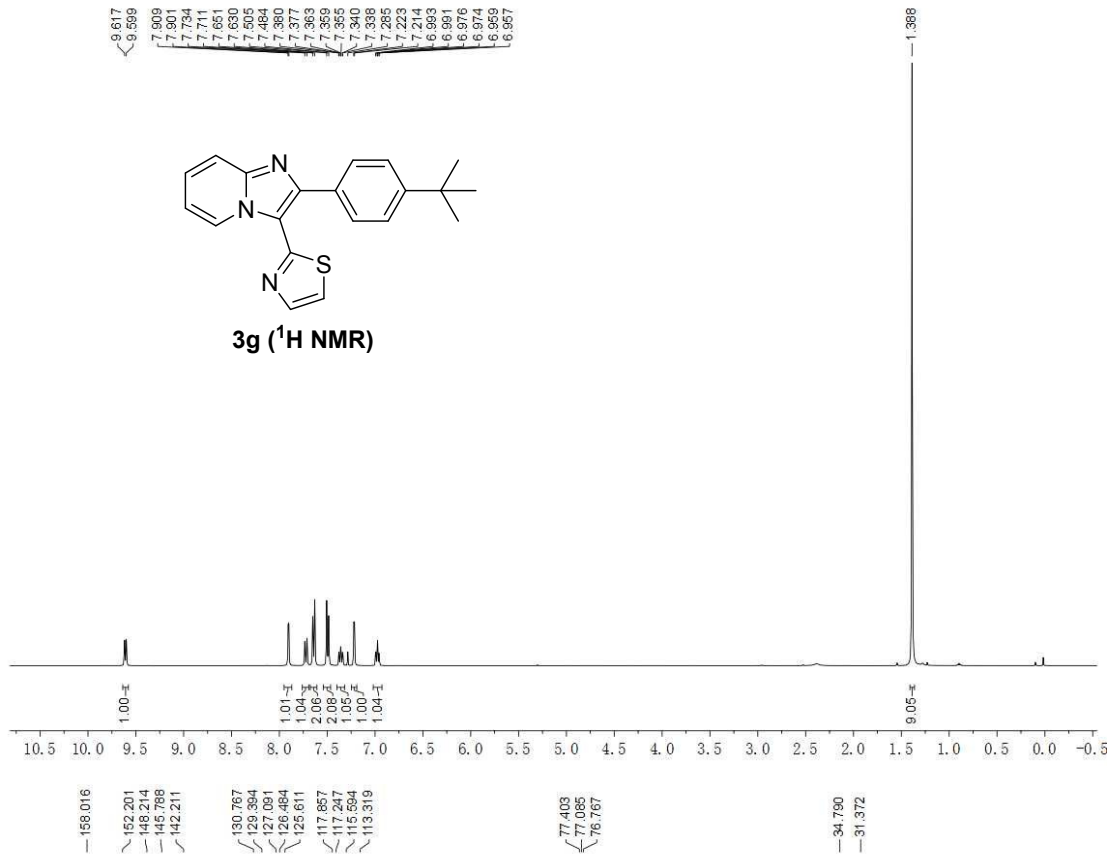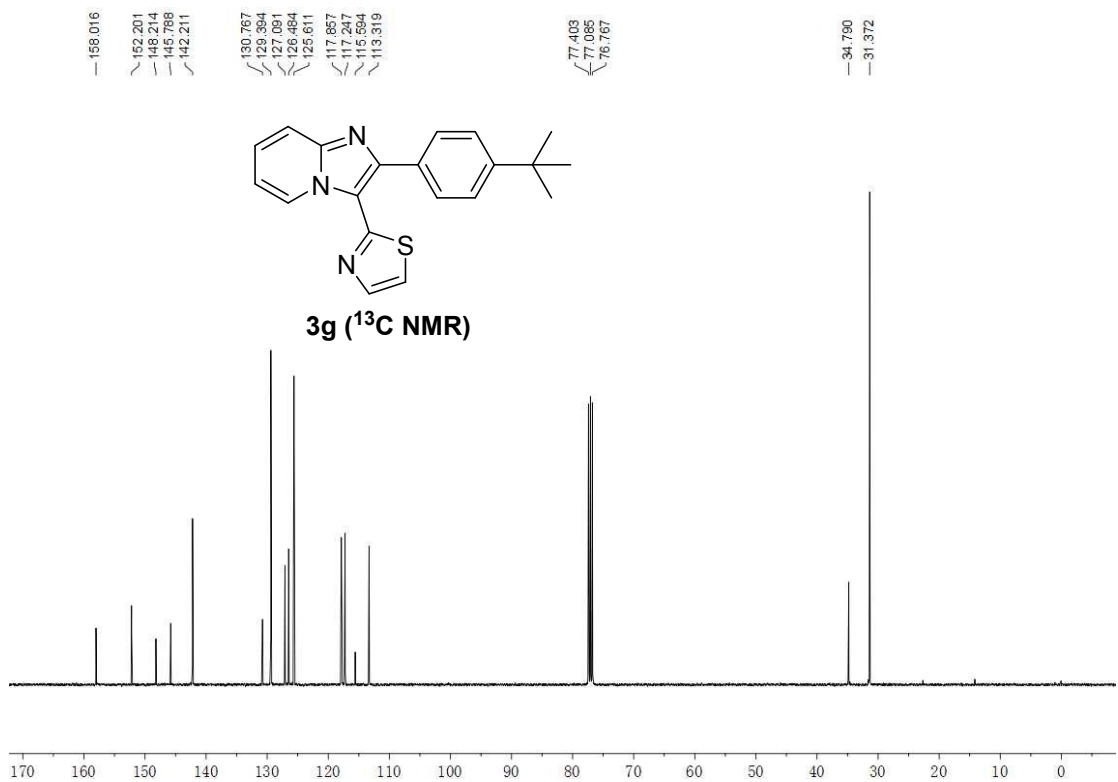



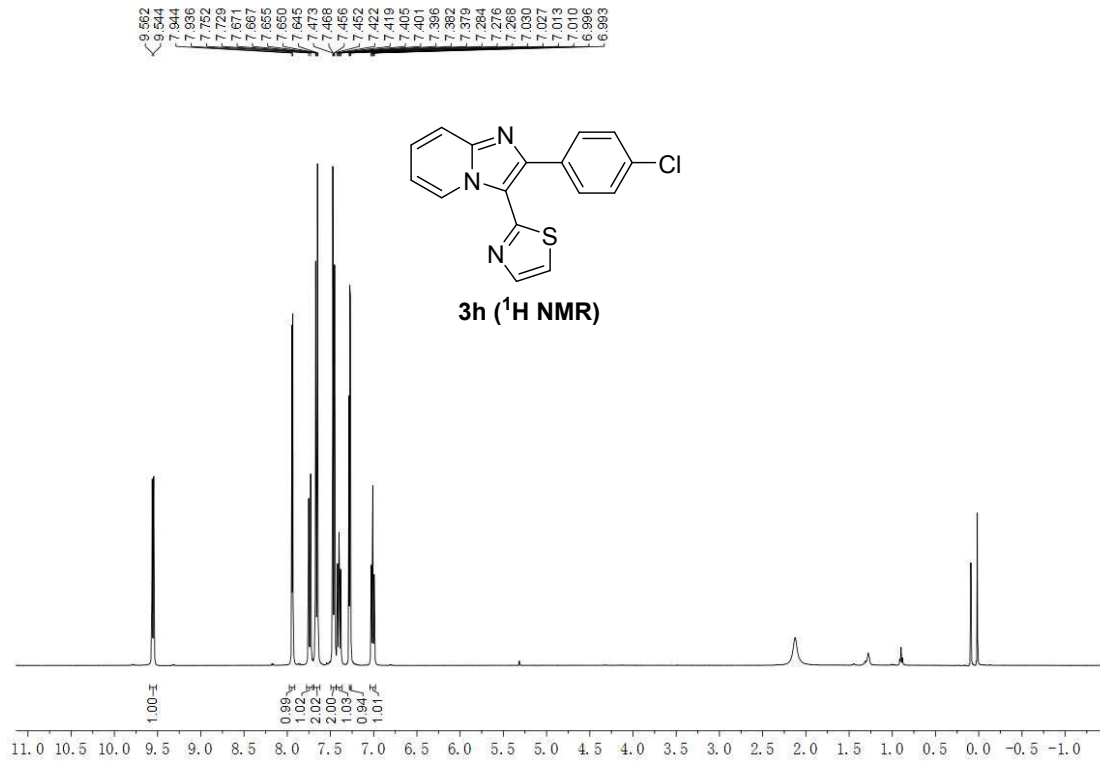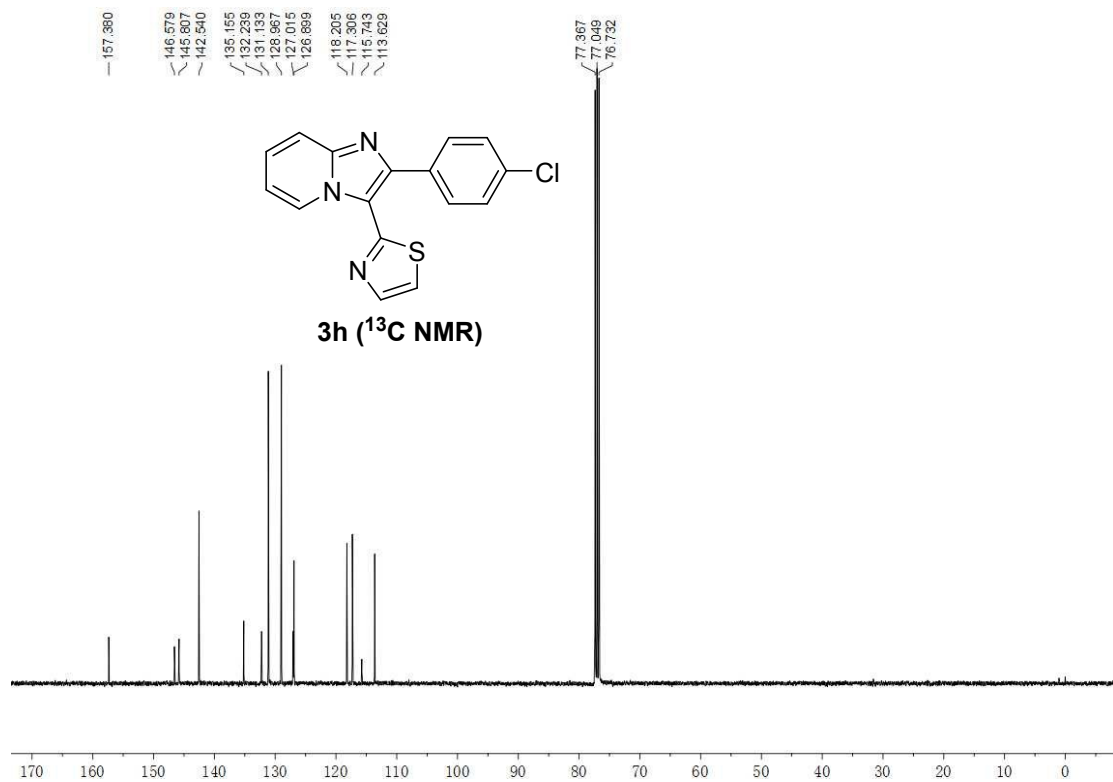

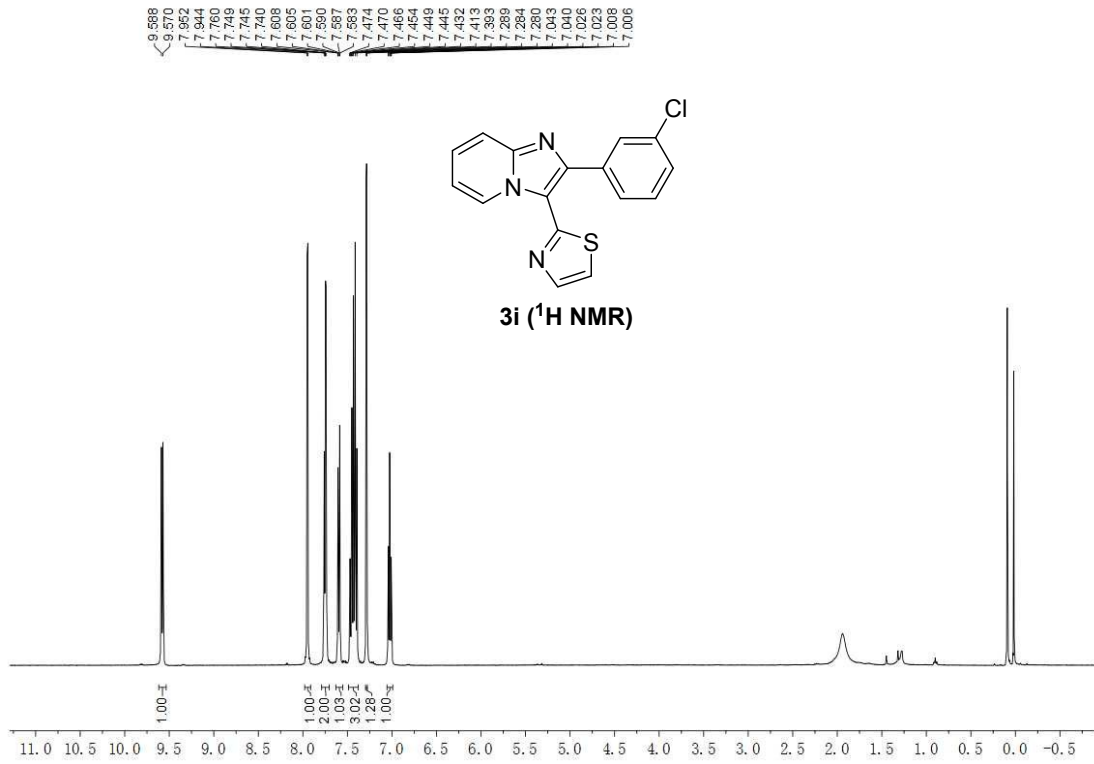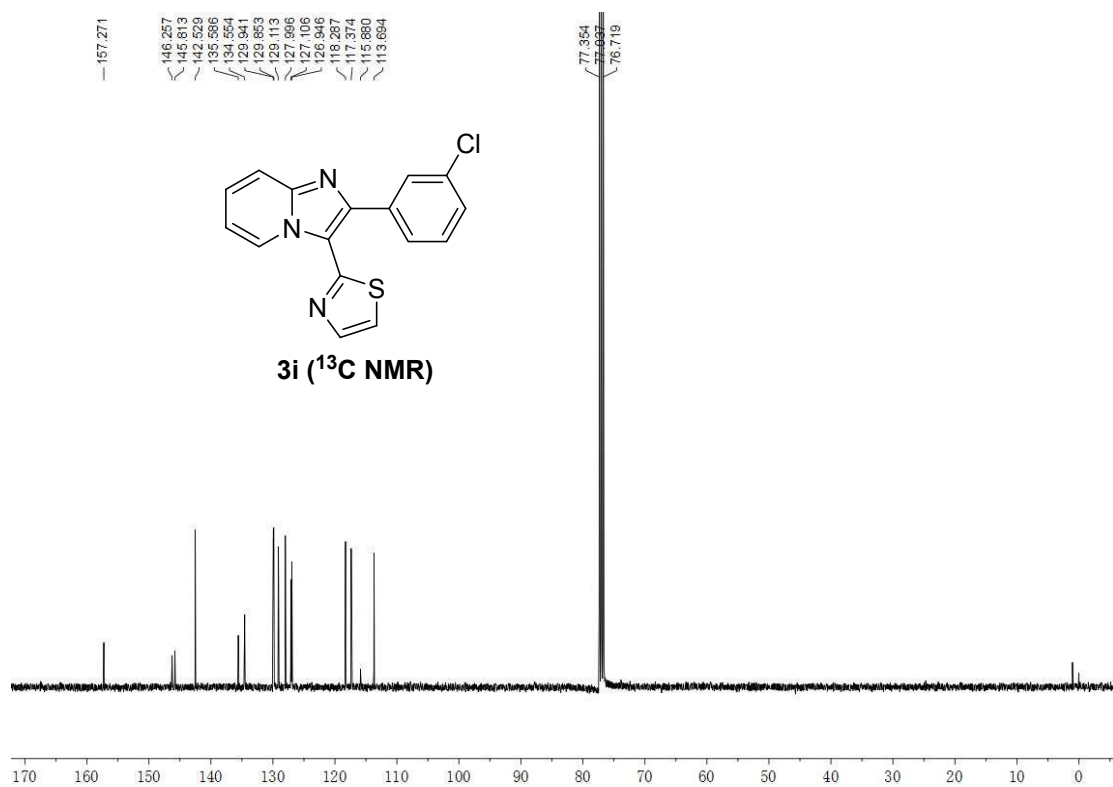

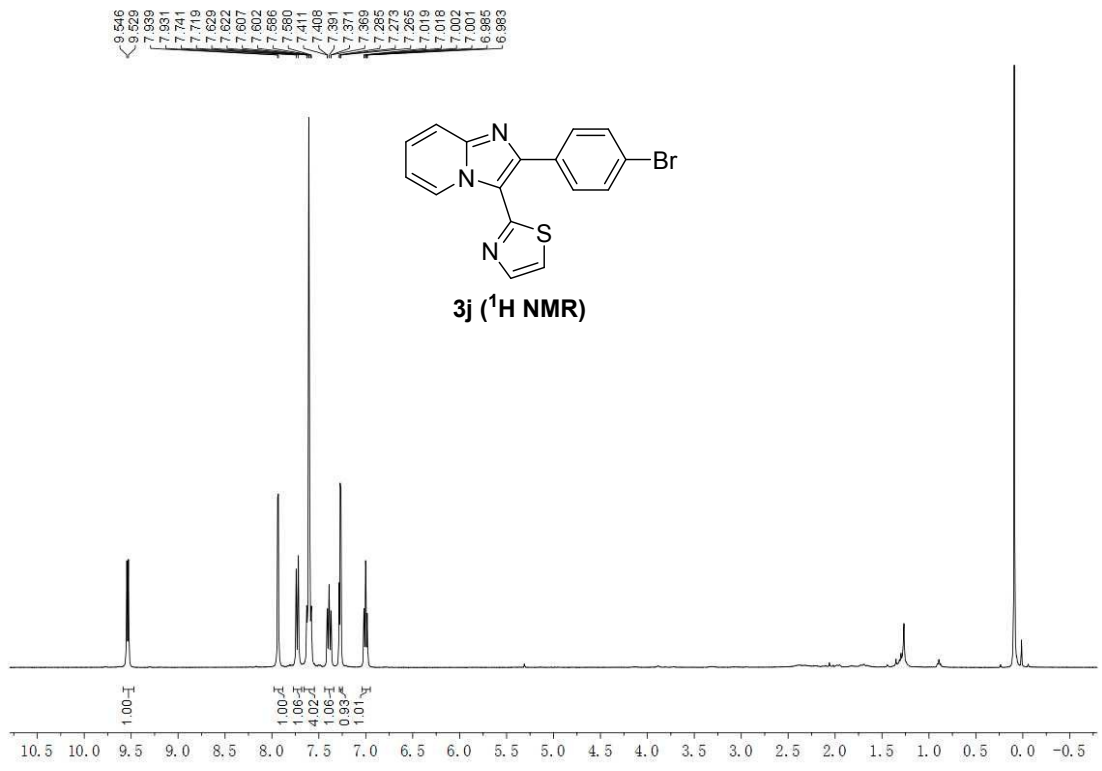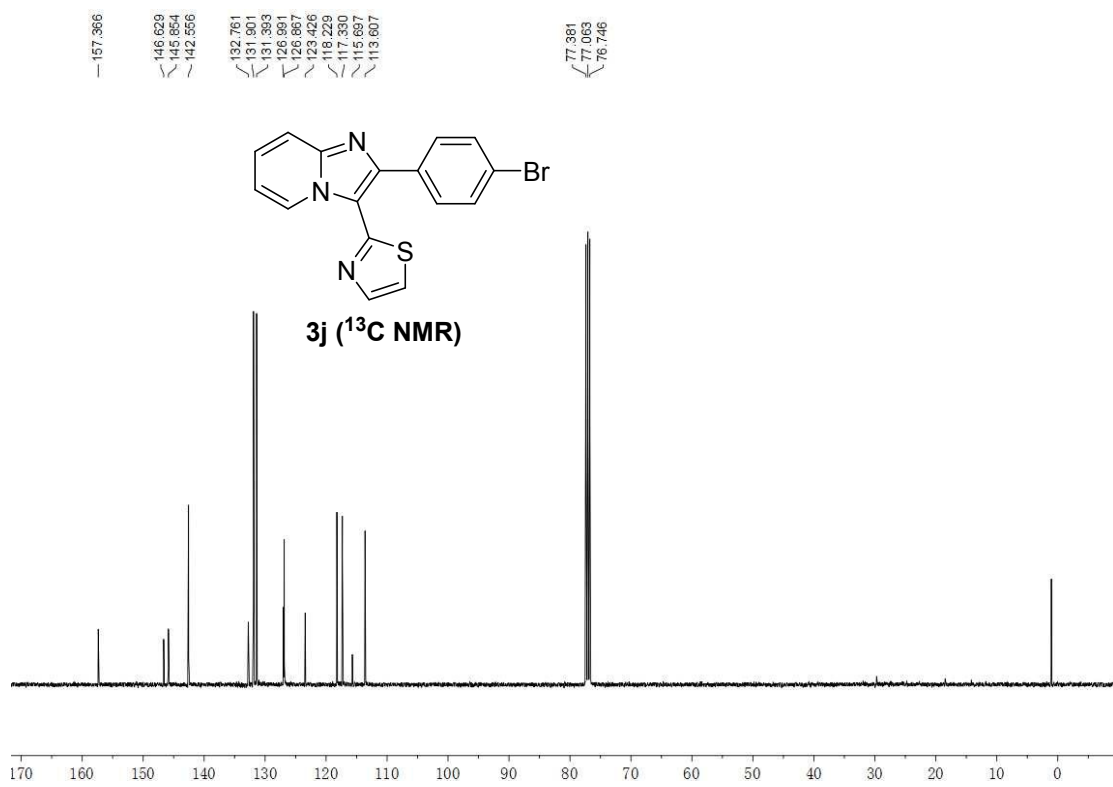

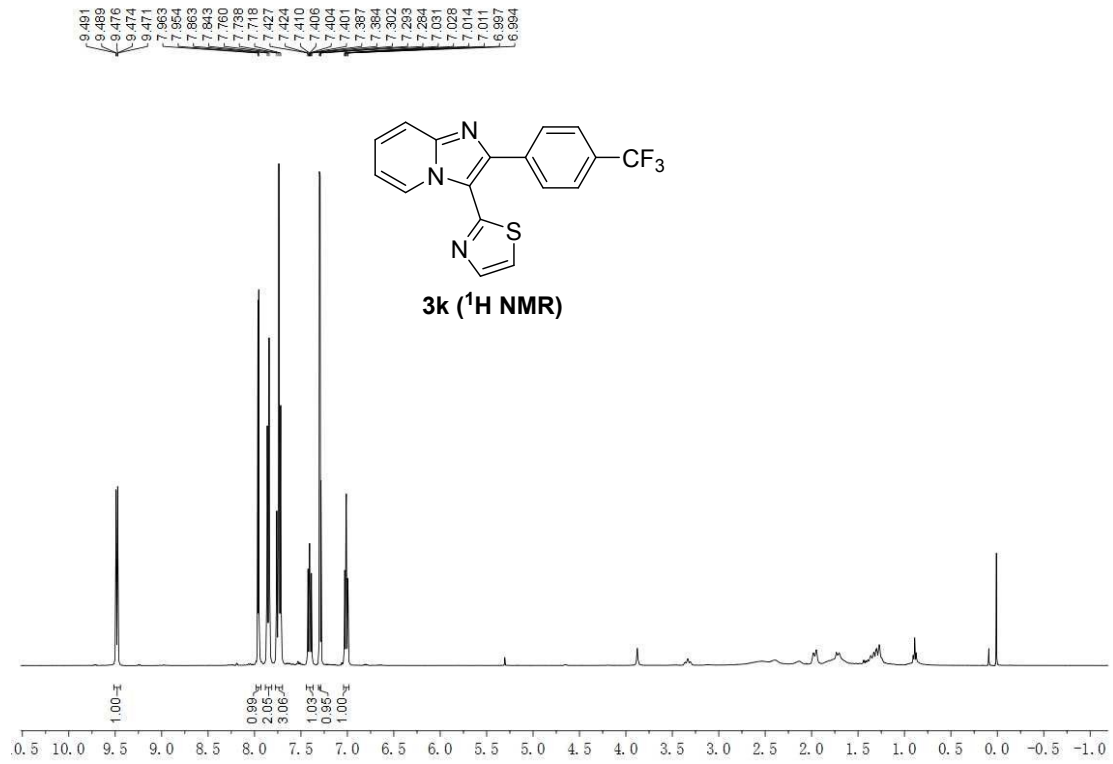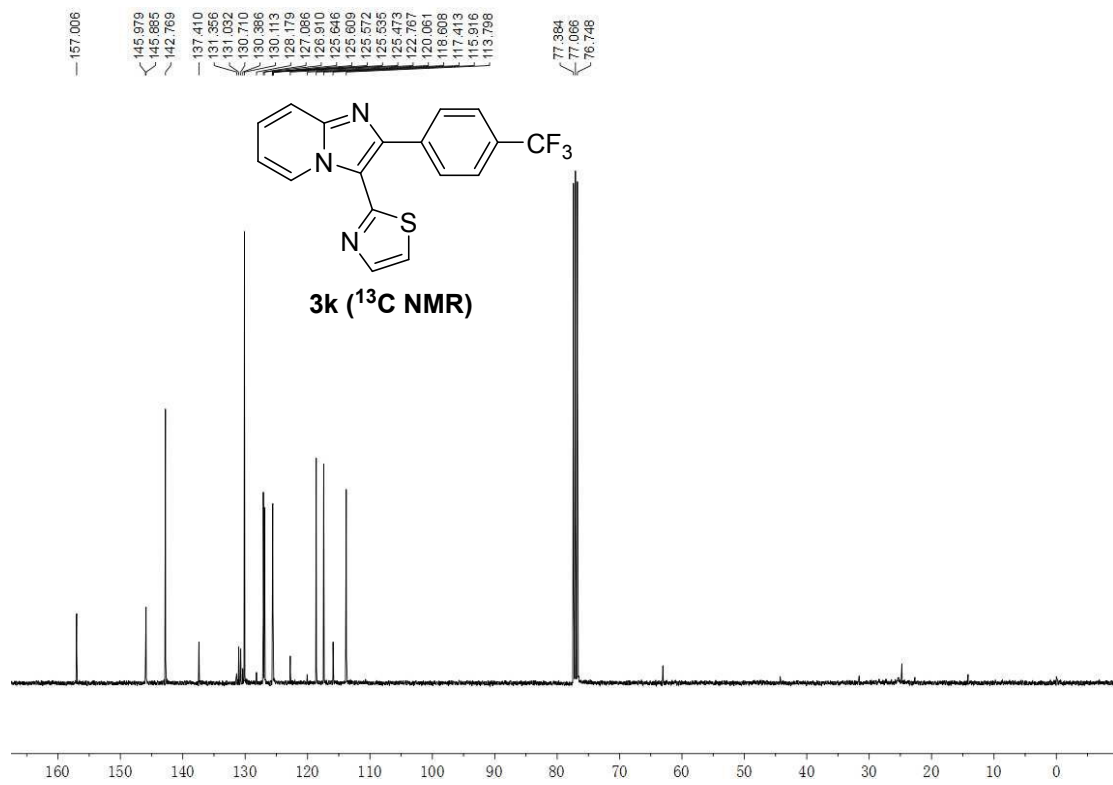

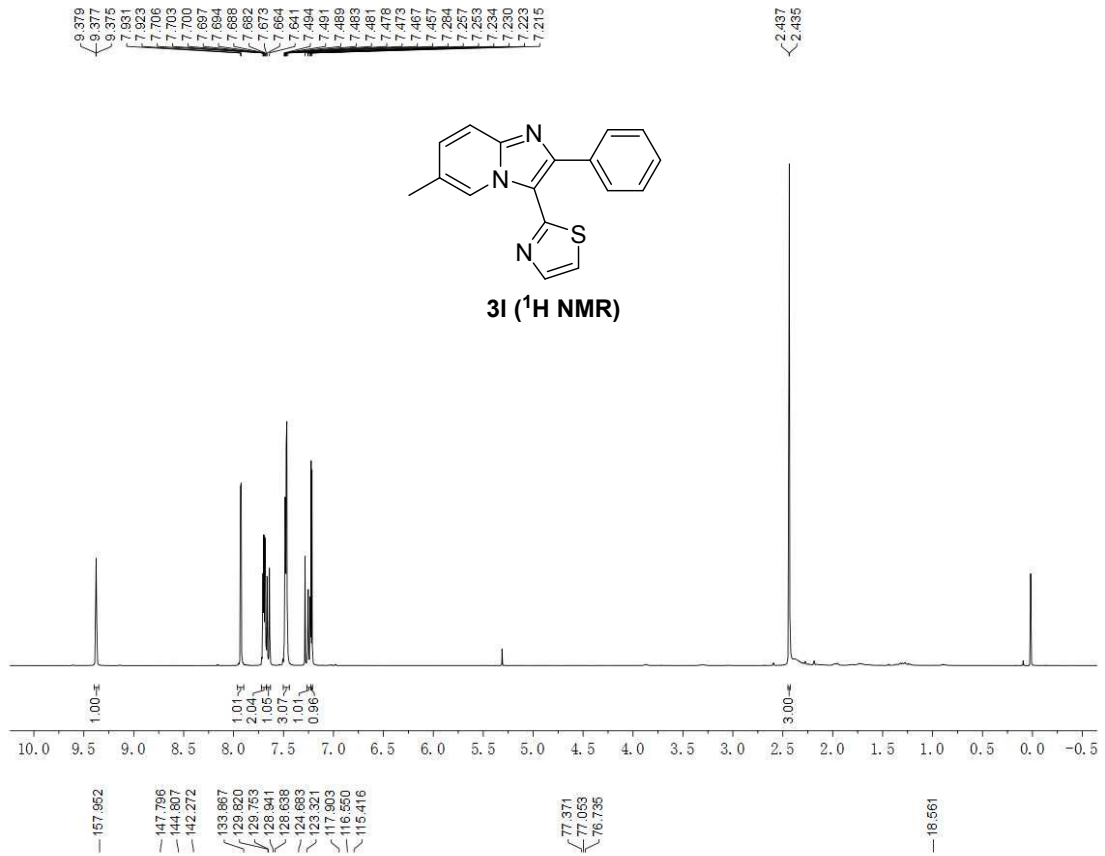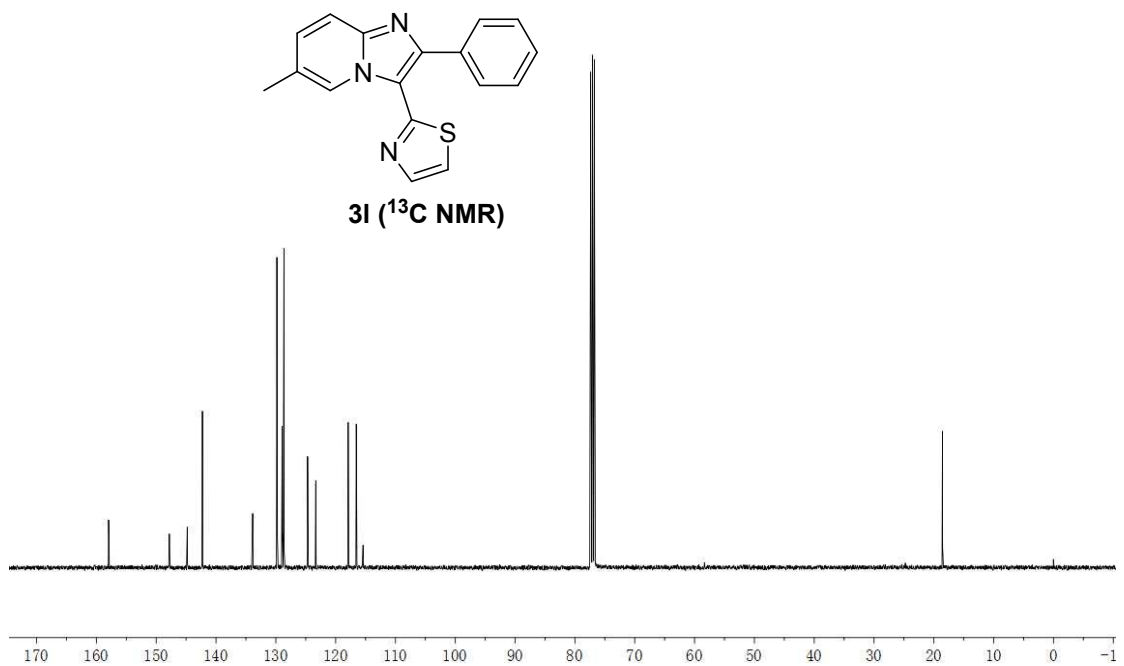

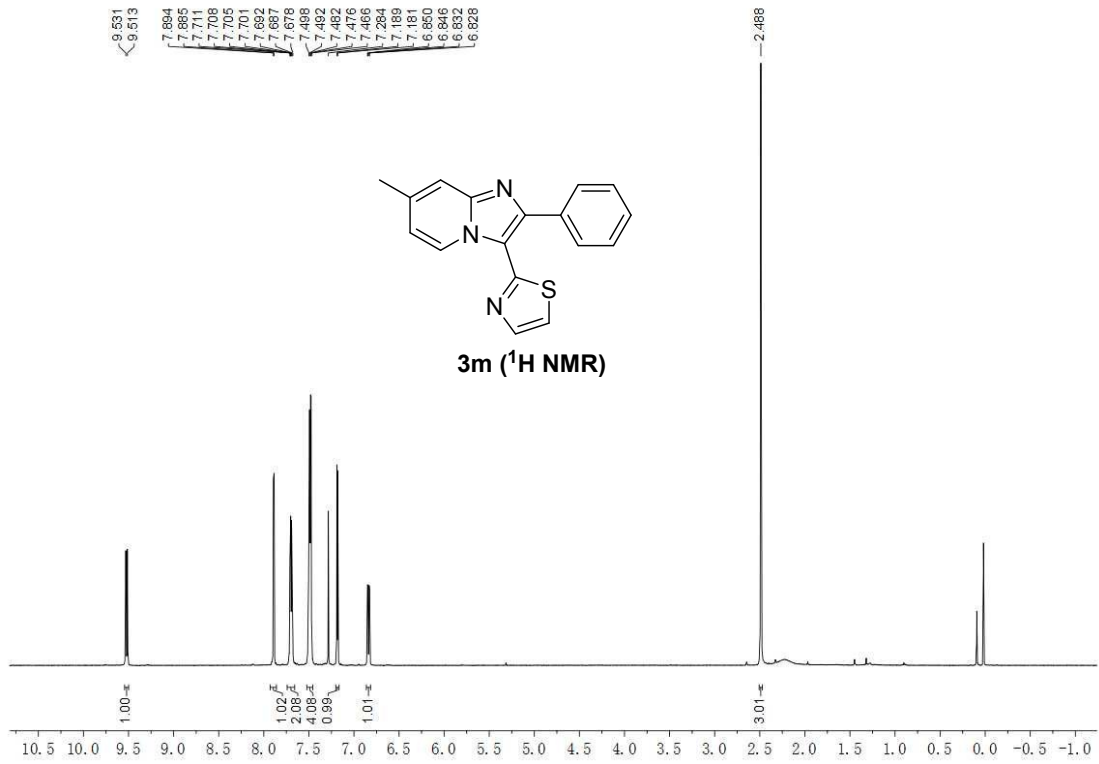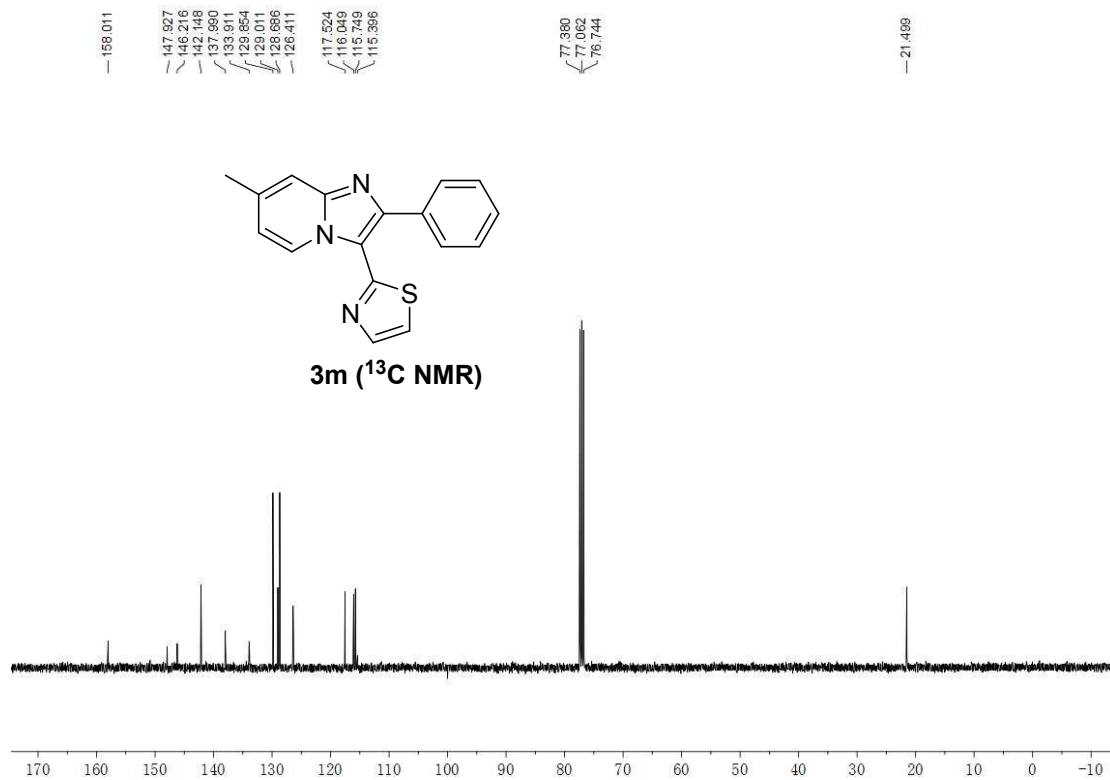

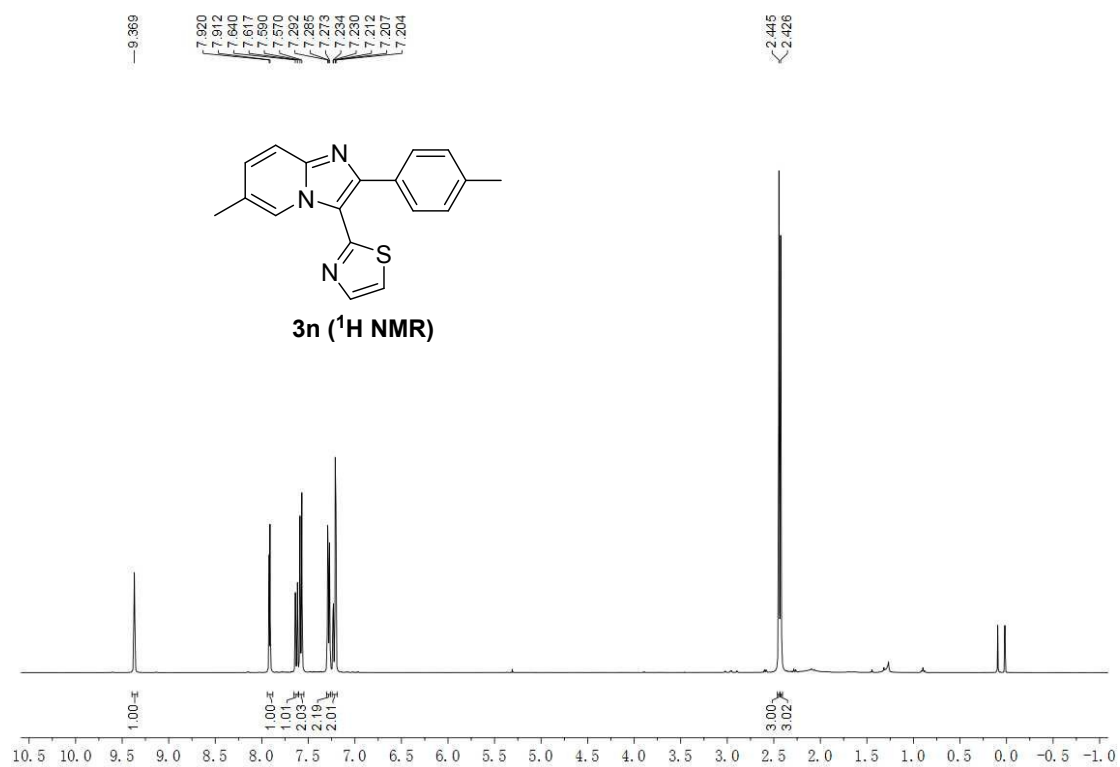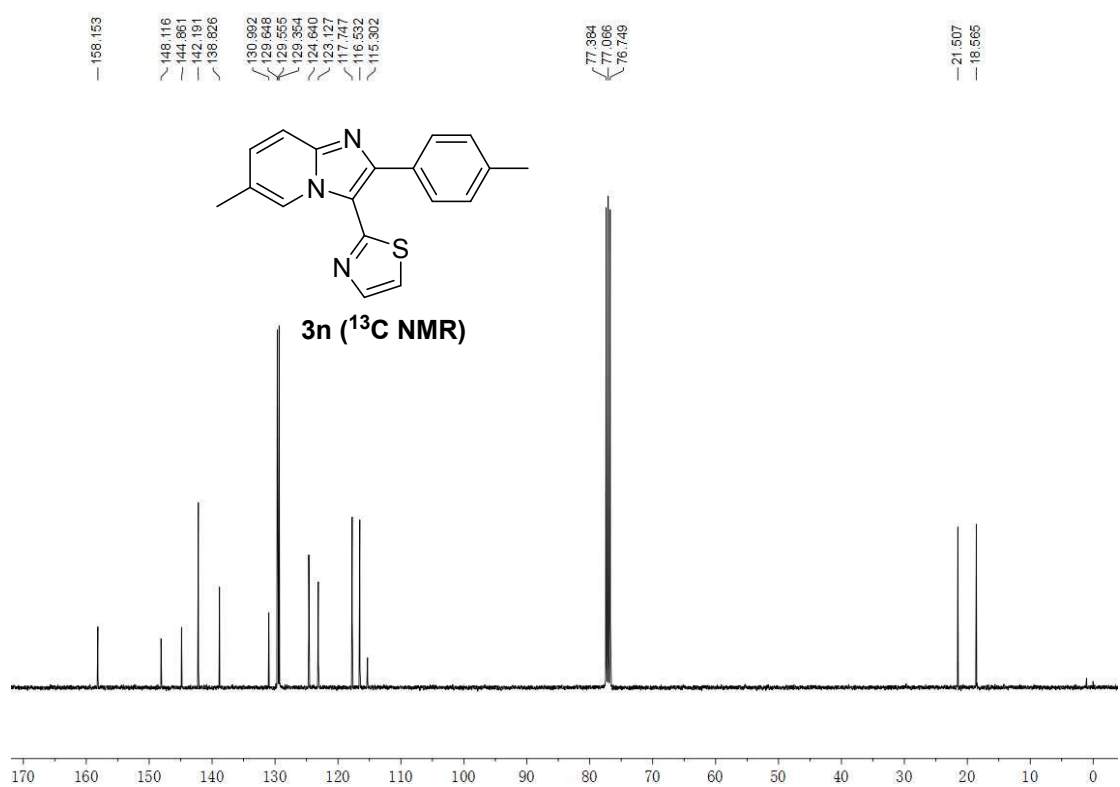

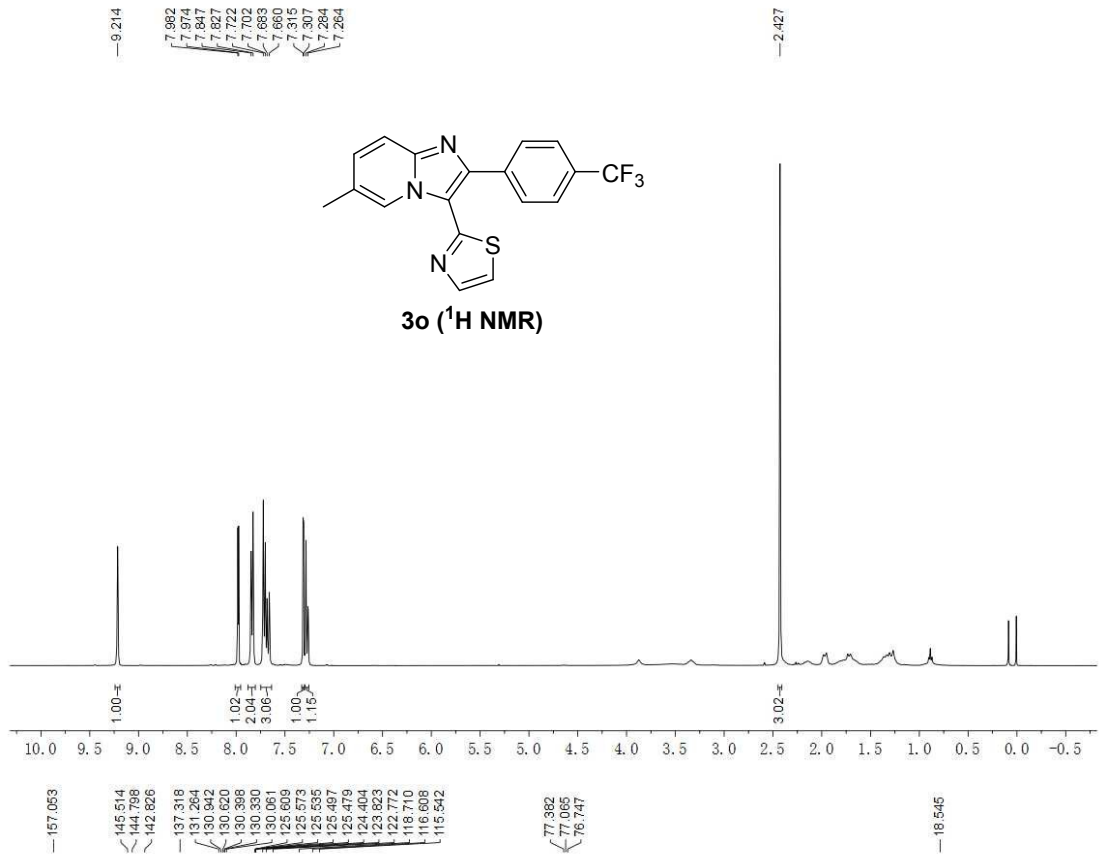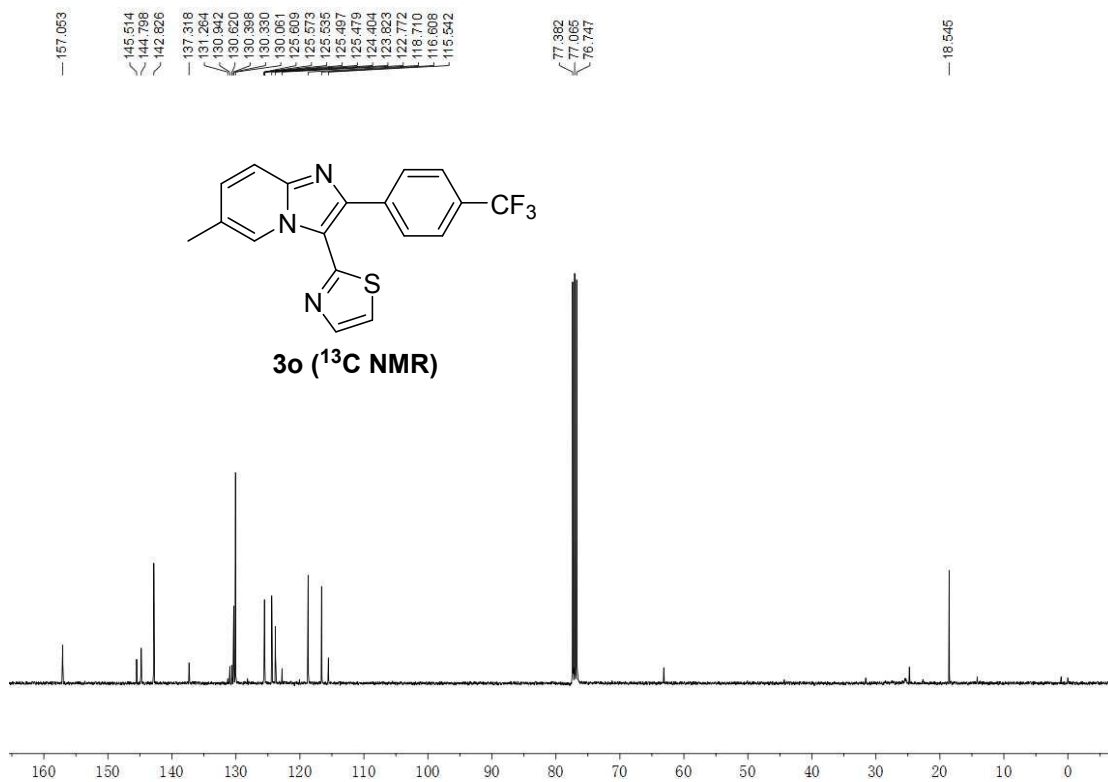



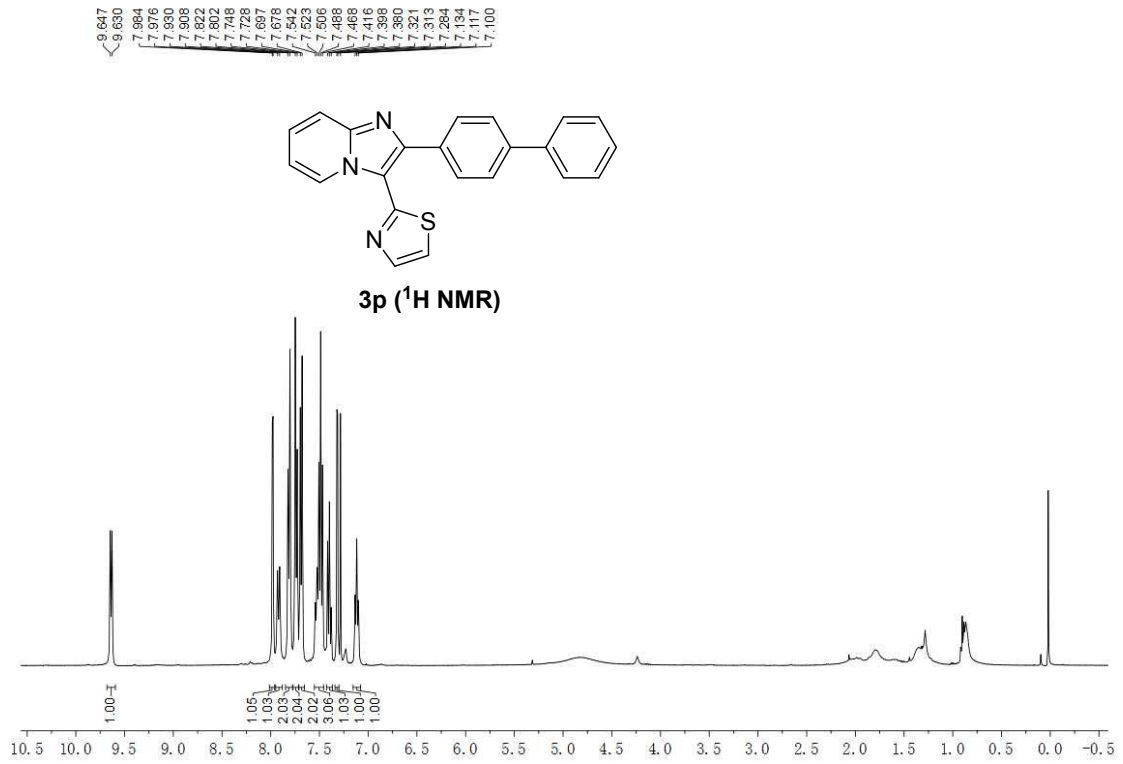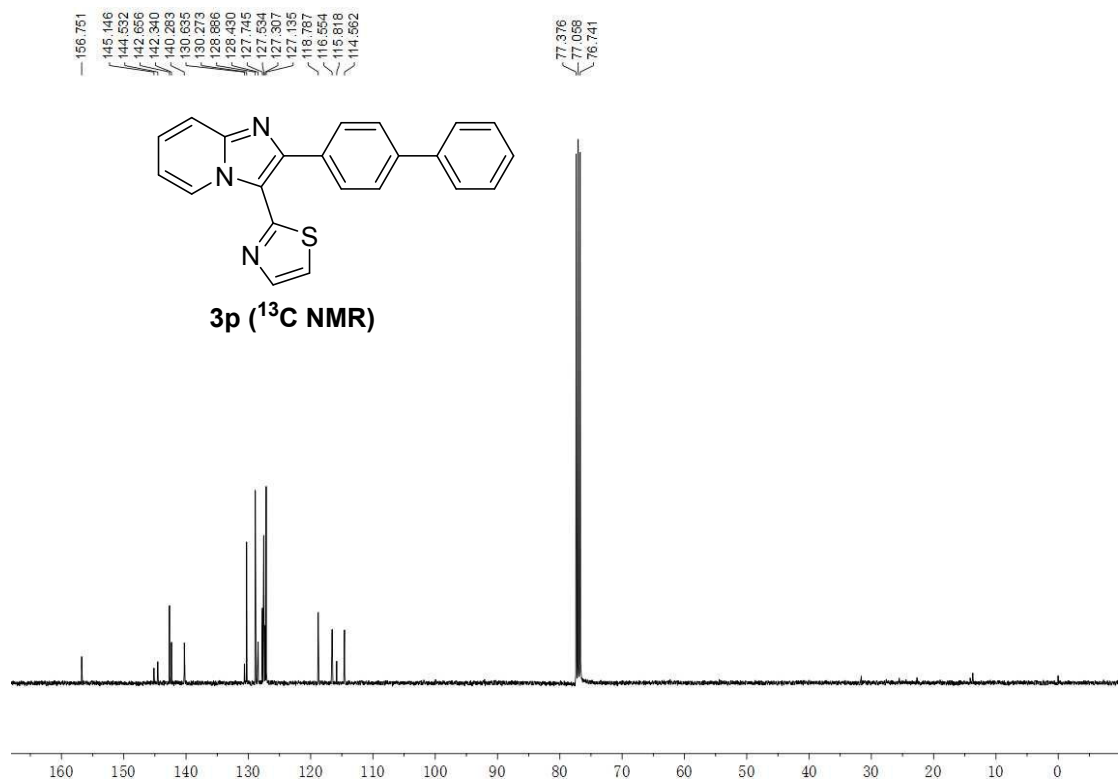

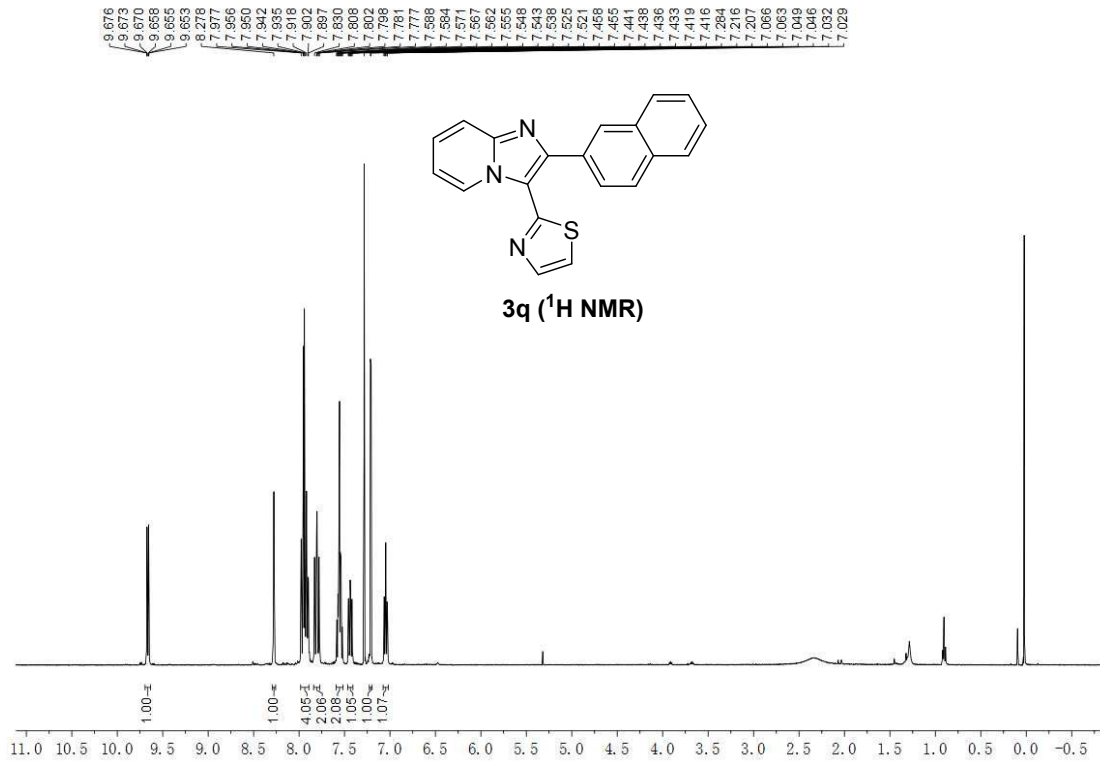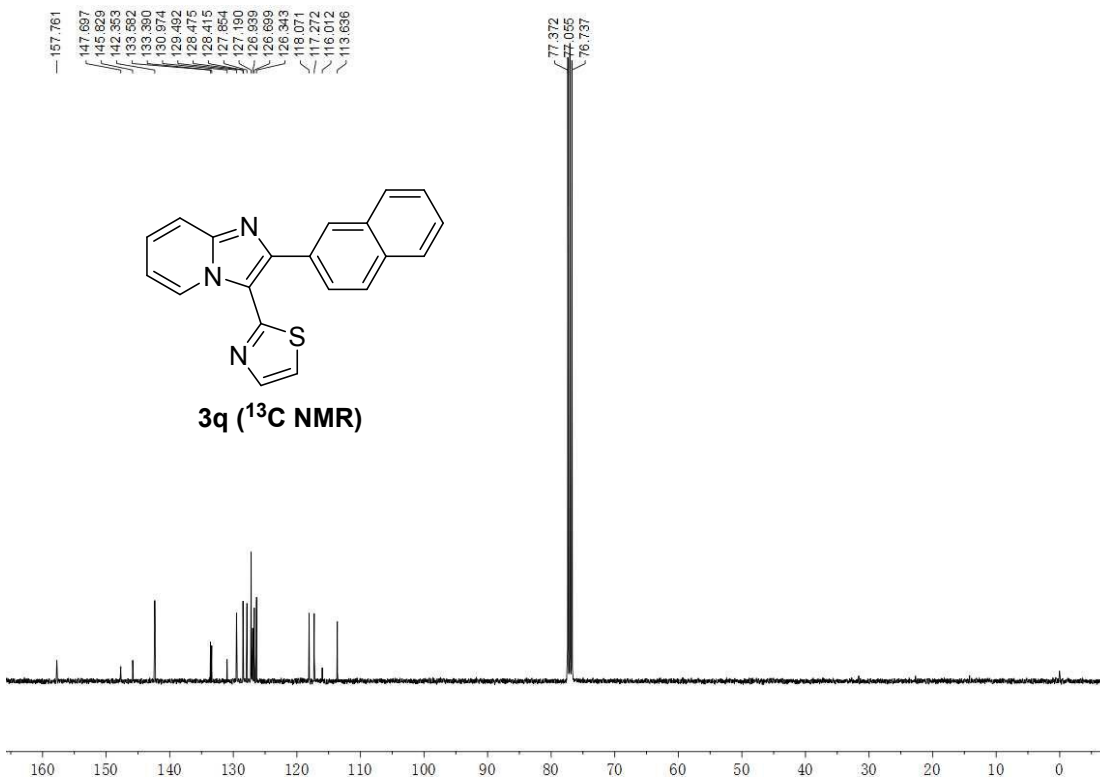

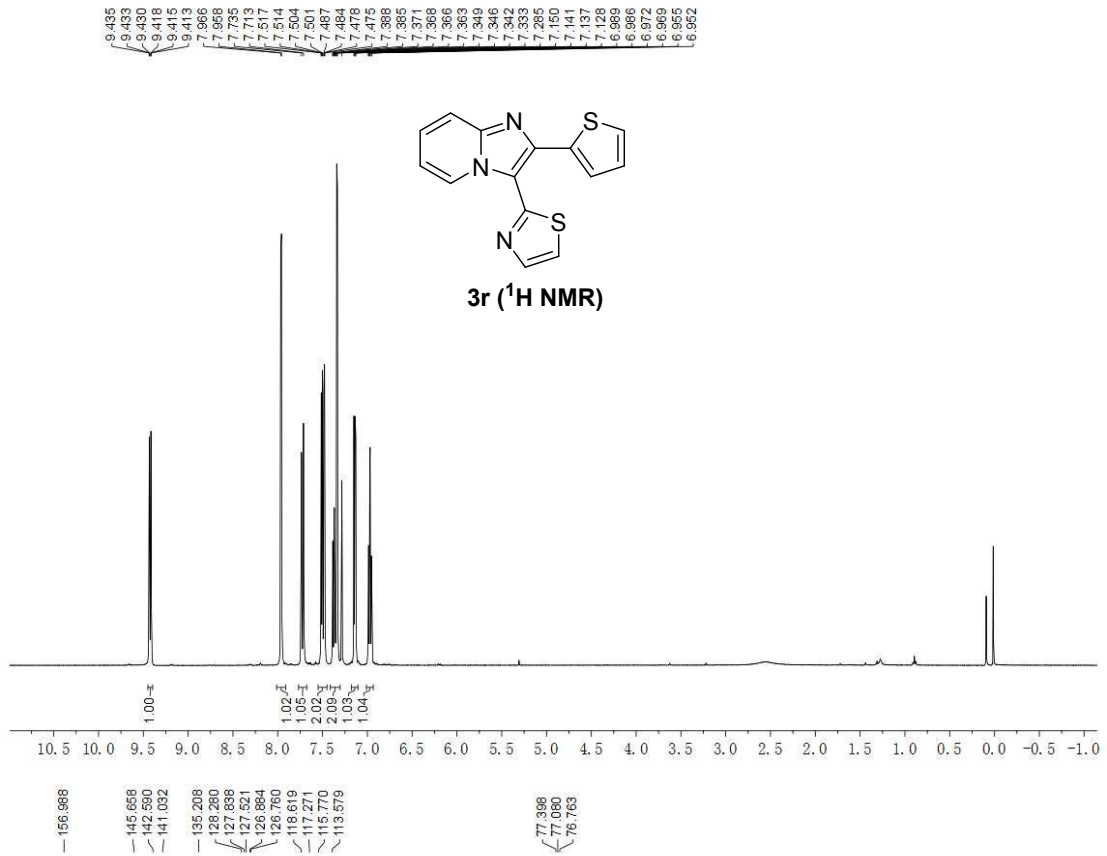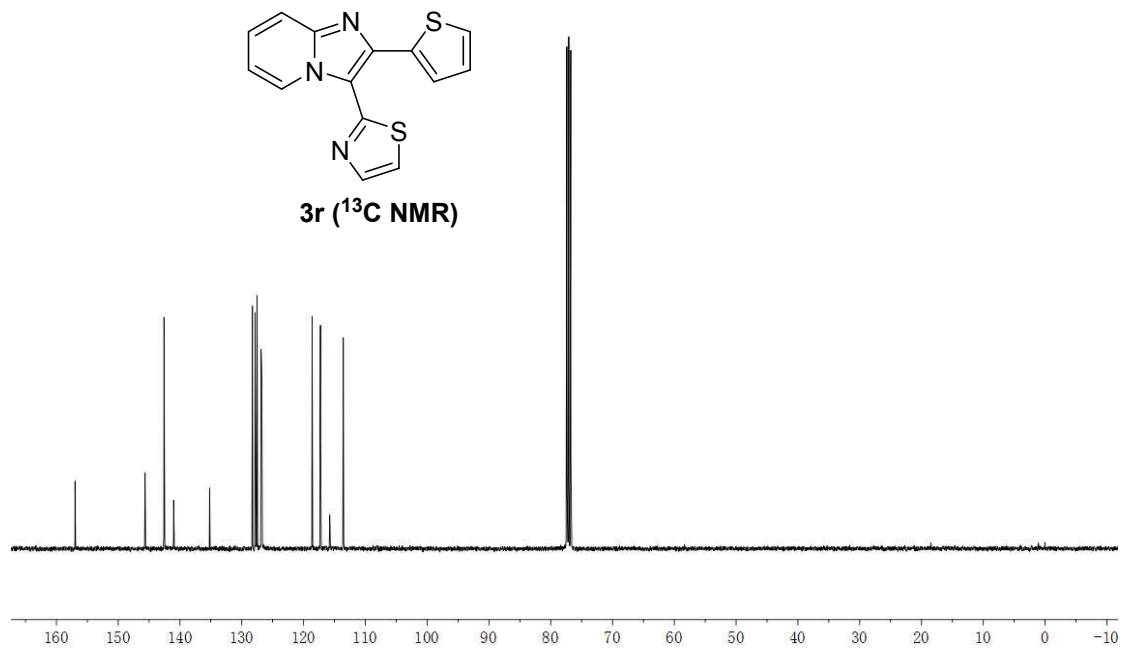

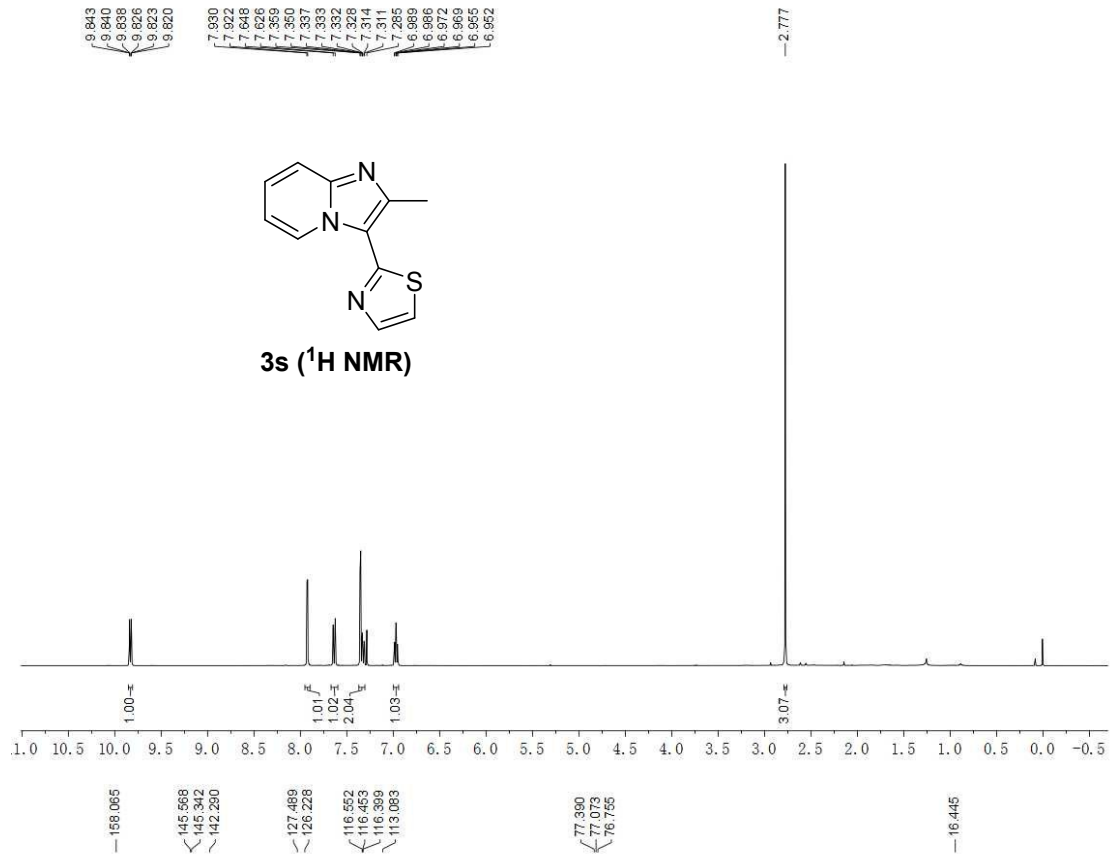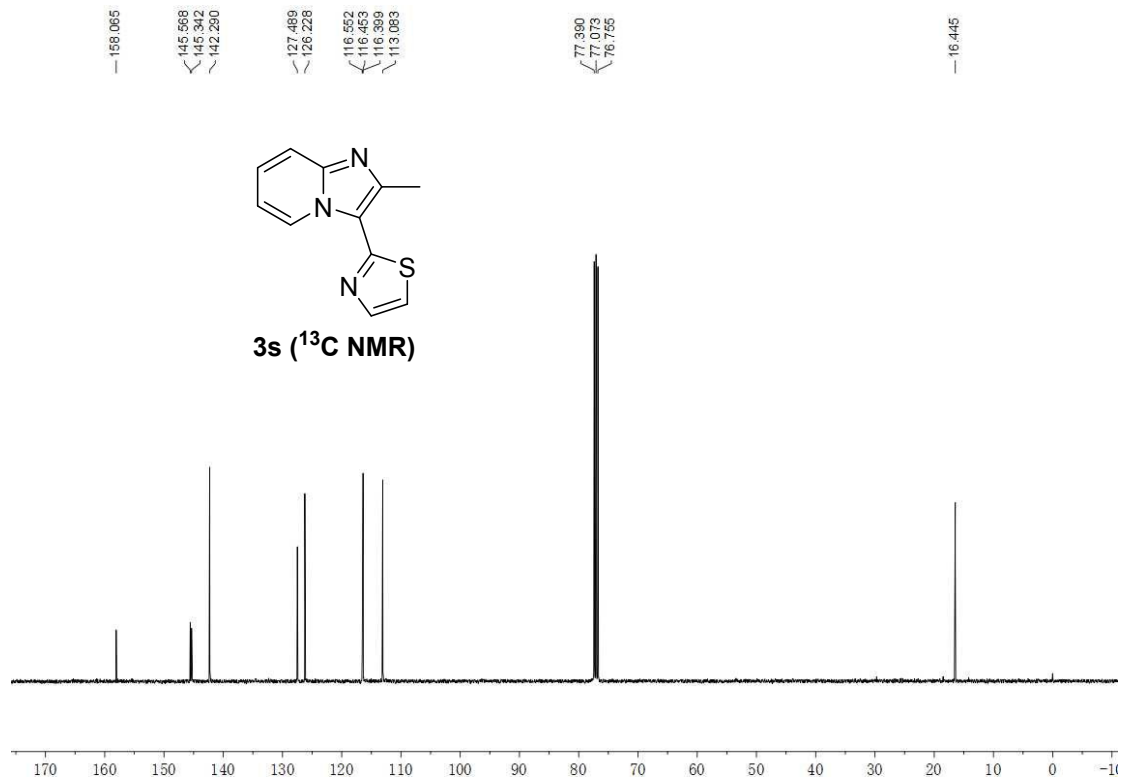

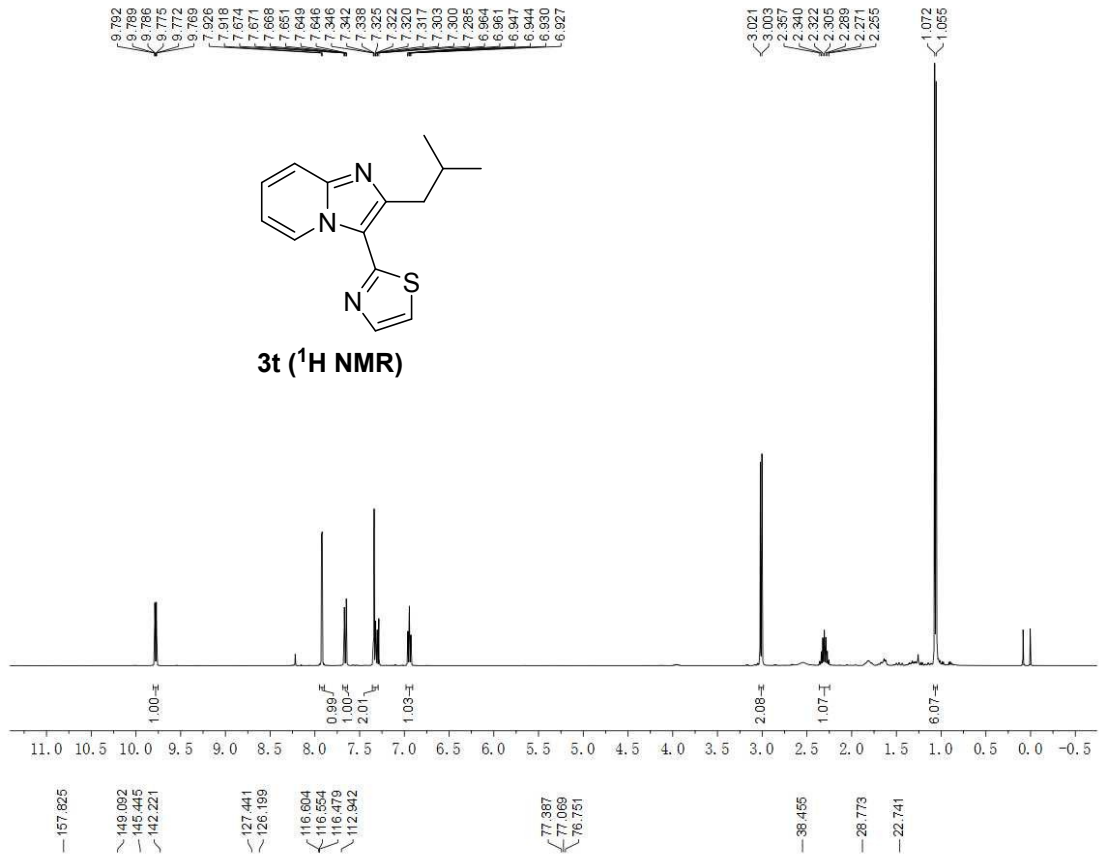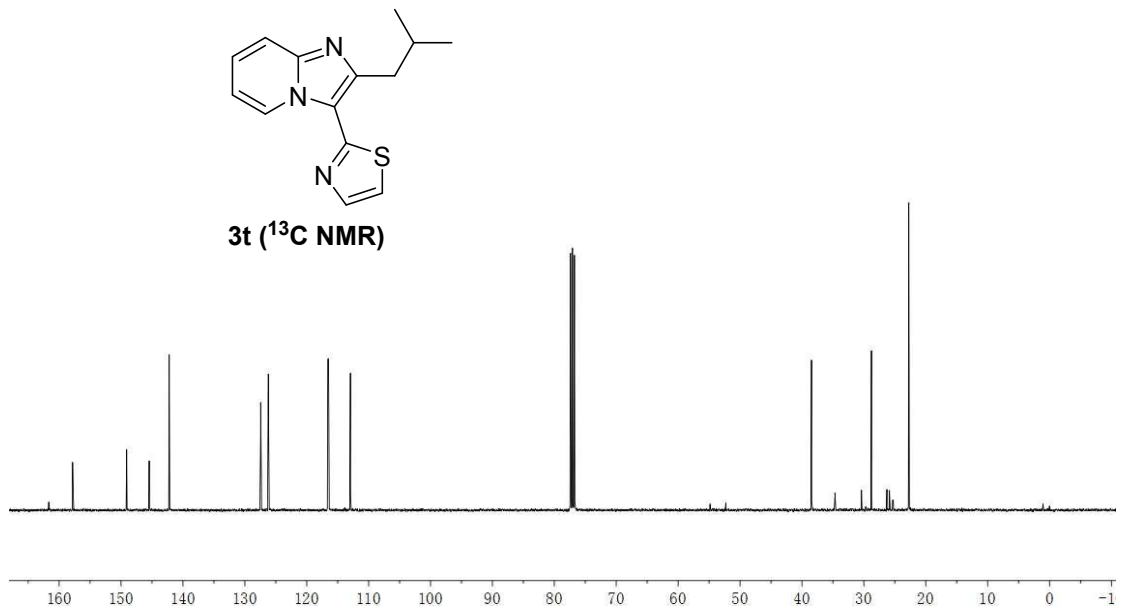

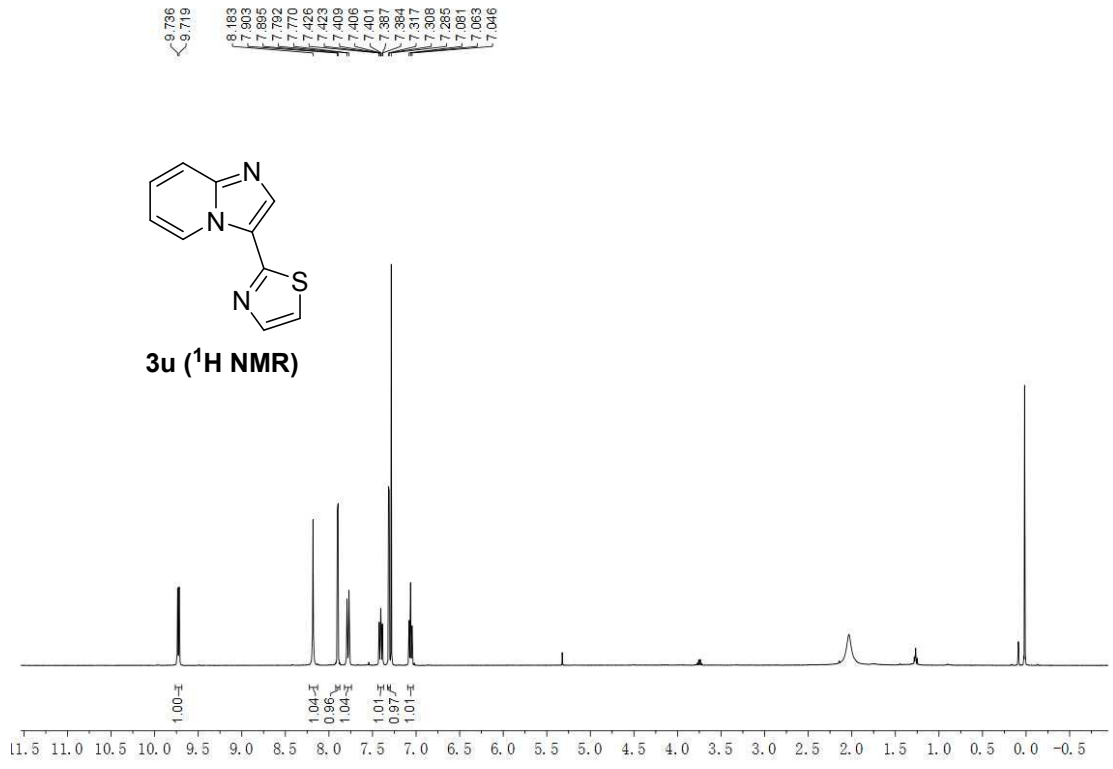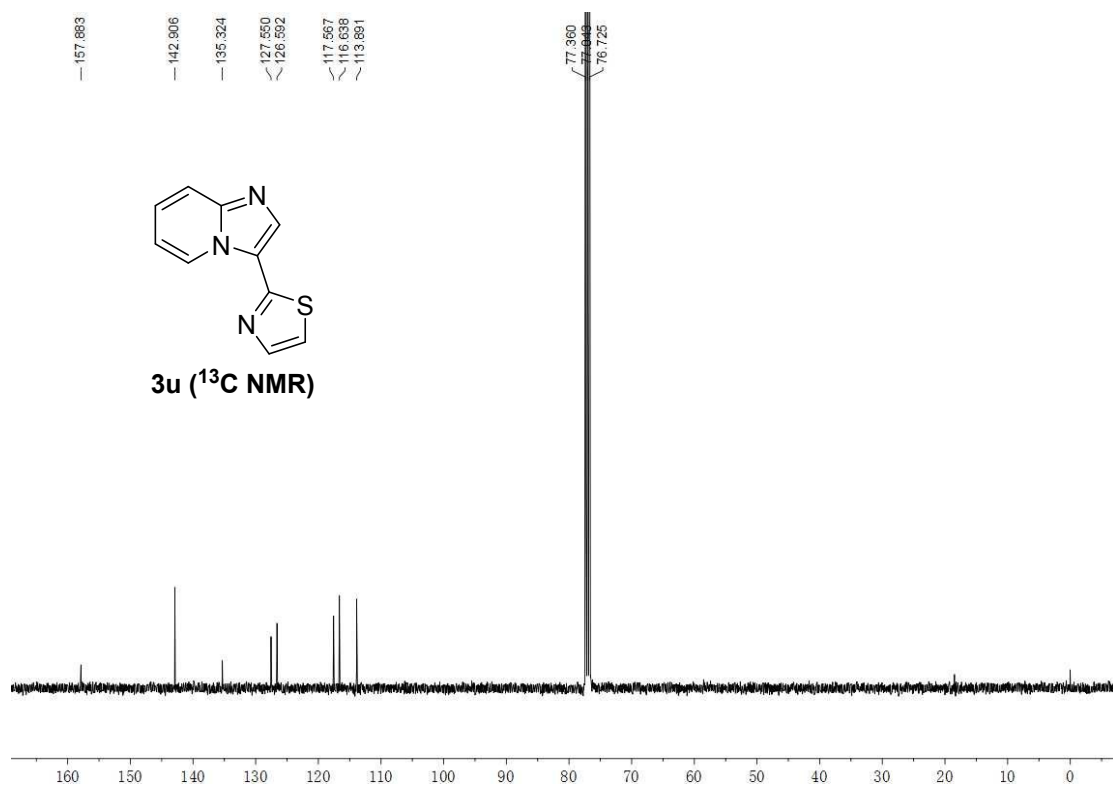

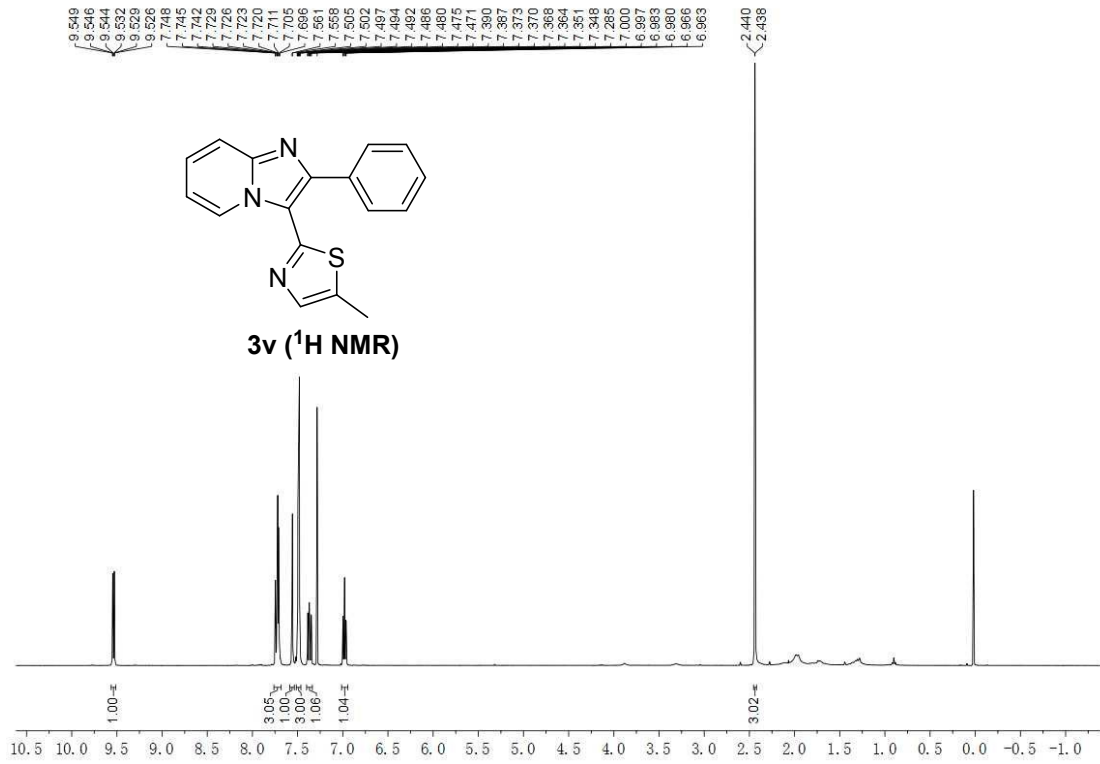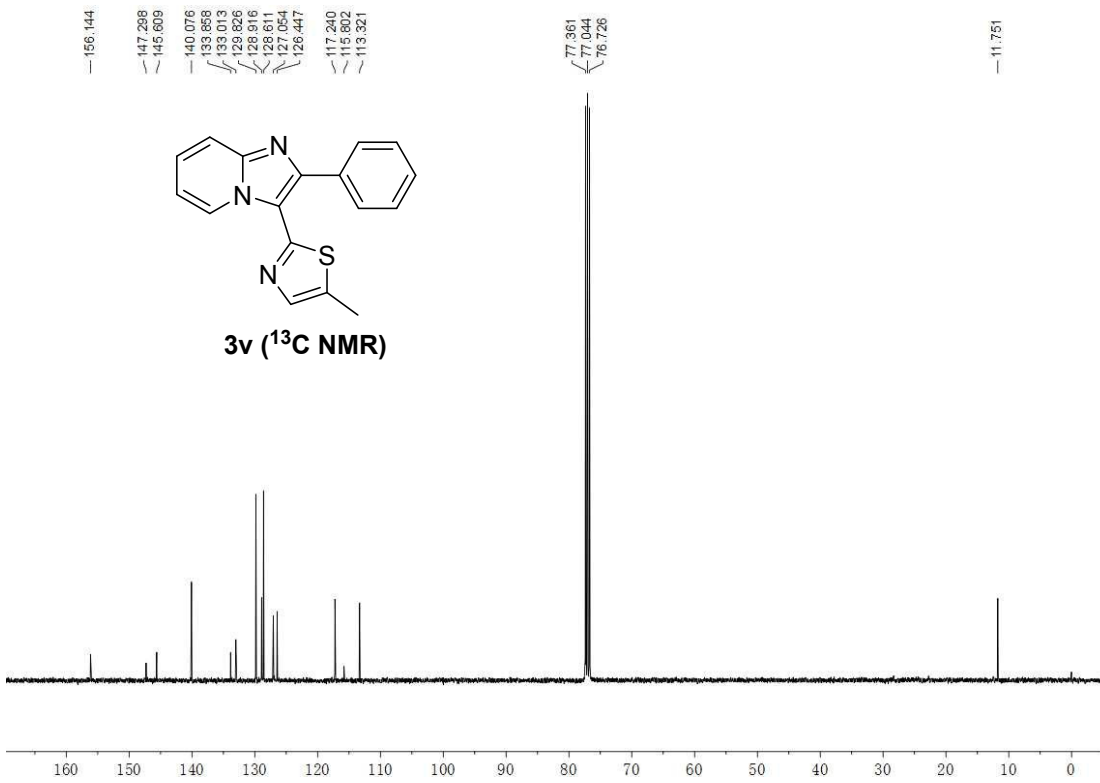

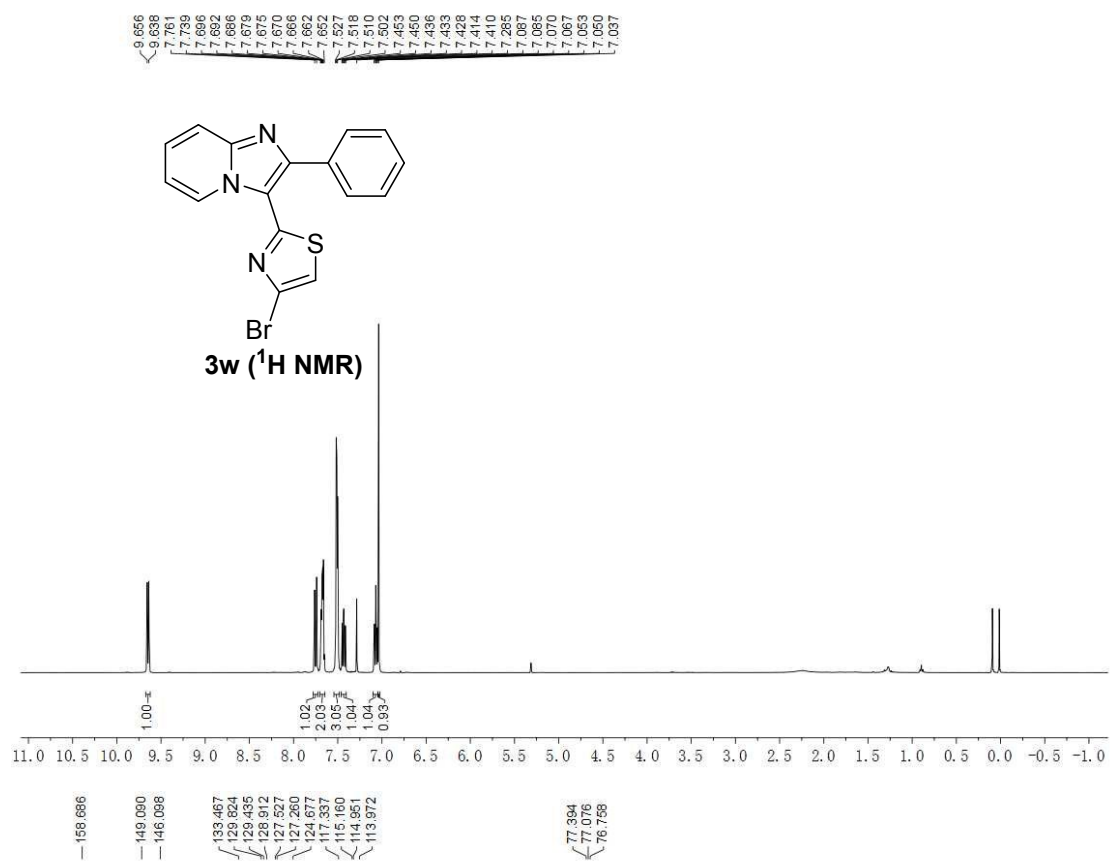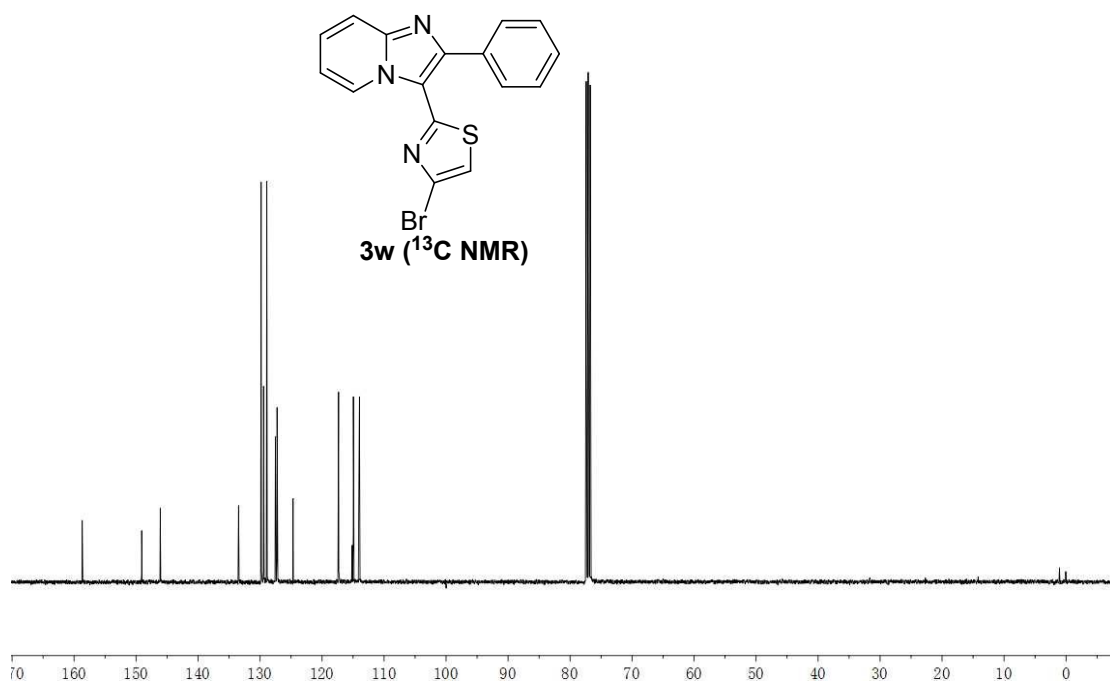



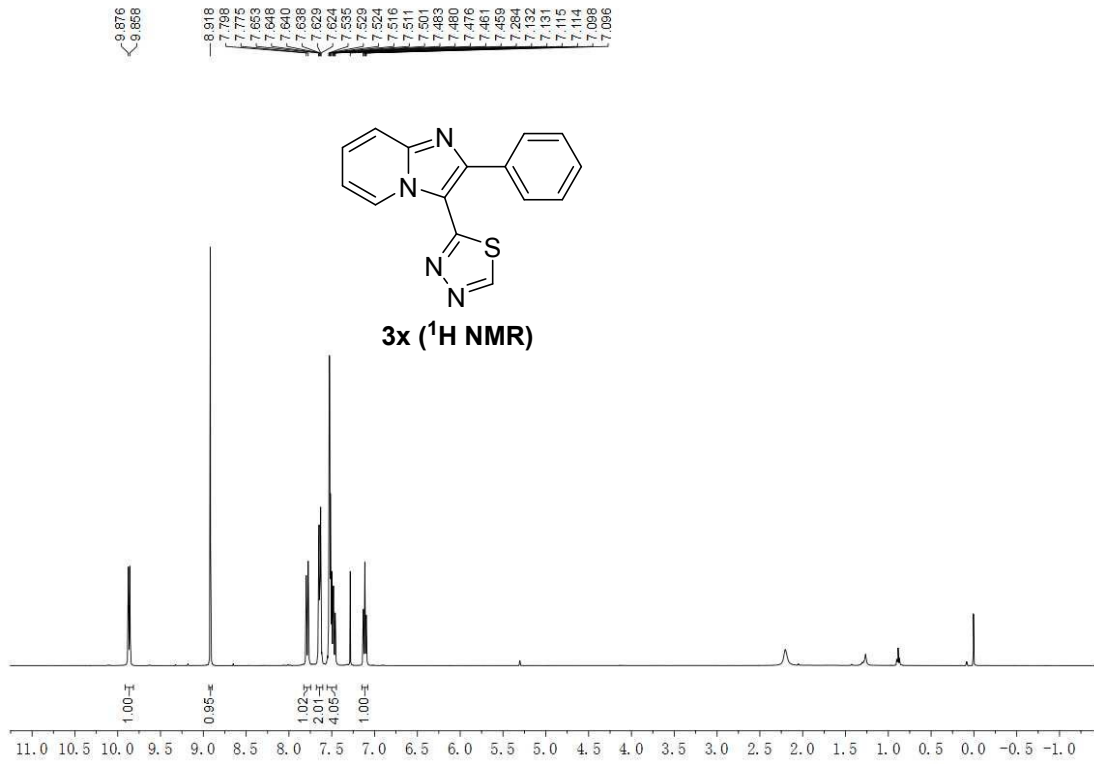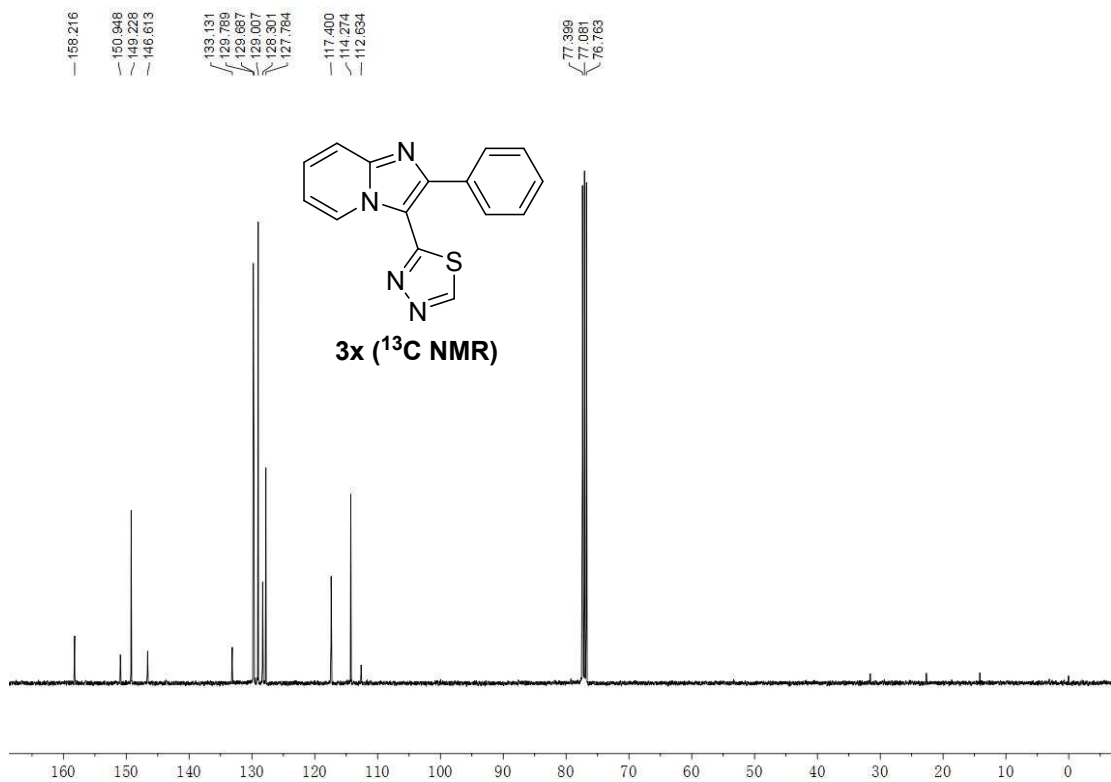

8.016  
8.013  
7.999  
7.996  
7.993  
7.791  
7.787  
7.782  
7.774  
7.770  
7.767  
7.761  
7.716  
7.714  
7.711  
7.694  
7.691  
7.688  
7.612  
7.609  
7.600  
7.596  
7.596  
7.368  
7.364  
7.359  
7.347  
7.343  
7.342  
7.332  
7.322  
7.316  
7.315  
7.311  
7.304  
7.297  
7.289  
7.285  
7.279  
7.274  
7.270  
7.261  
7.257  
7.254  
7.252  
7.248  
7.243  
7.240  
7.235  
7.231  
6.824  
6.821  
6.807  
6.804  
6.790  
6.787

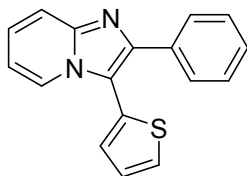

**3y (<sup>1</sup>H NMR)**

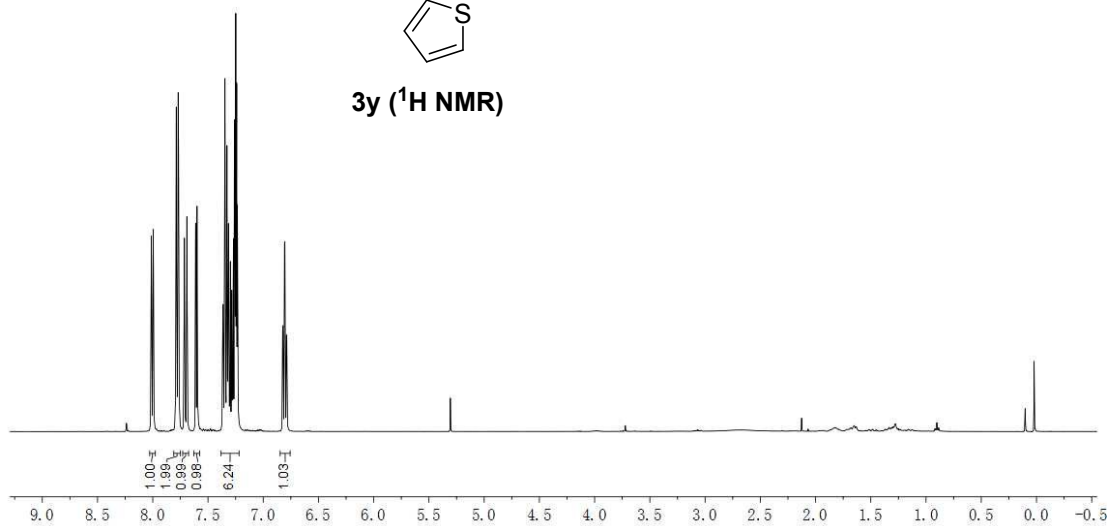

145.234  
144.406  
144.406  
133.743  
130.329  
129.860  
128.916  
128.346  
128.184  
128.006  
127.844  
125.294  
123.893  
117.398  
113.373  
112.615  
77.421  
77.103  
76.785

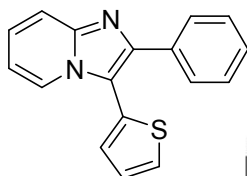

**3y (<sup>13</sup>C NMR)**

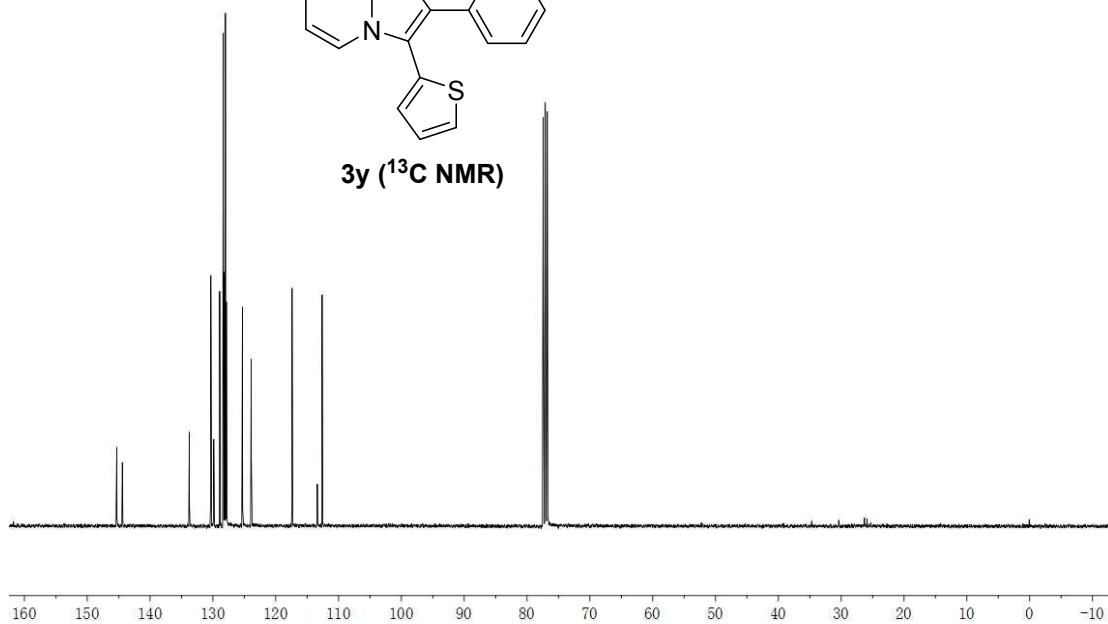

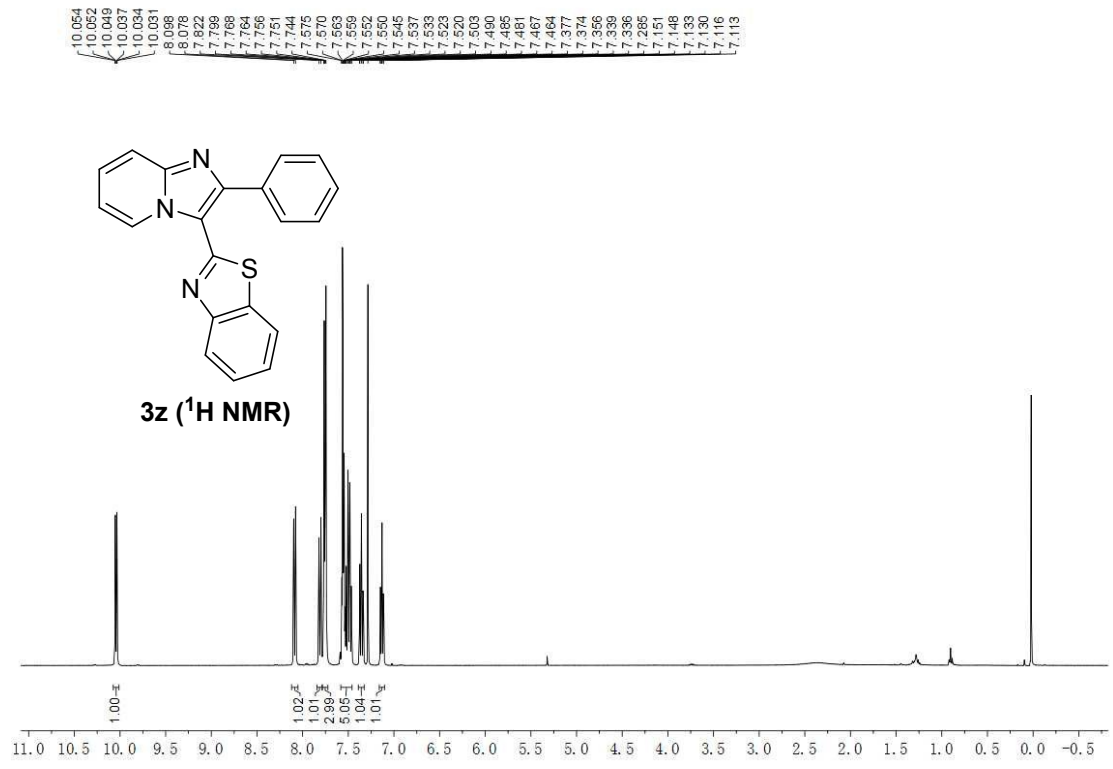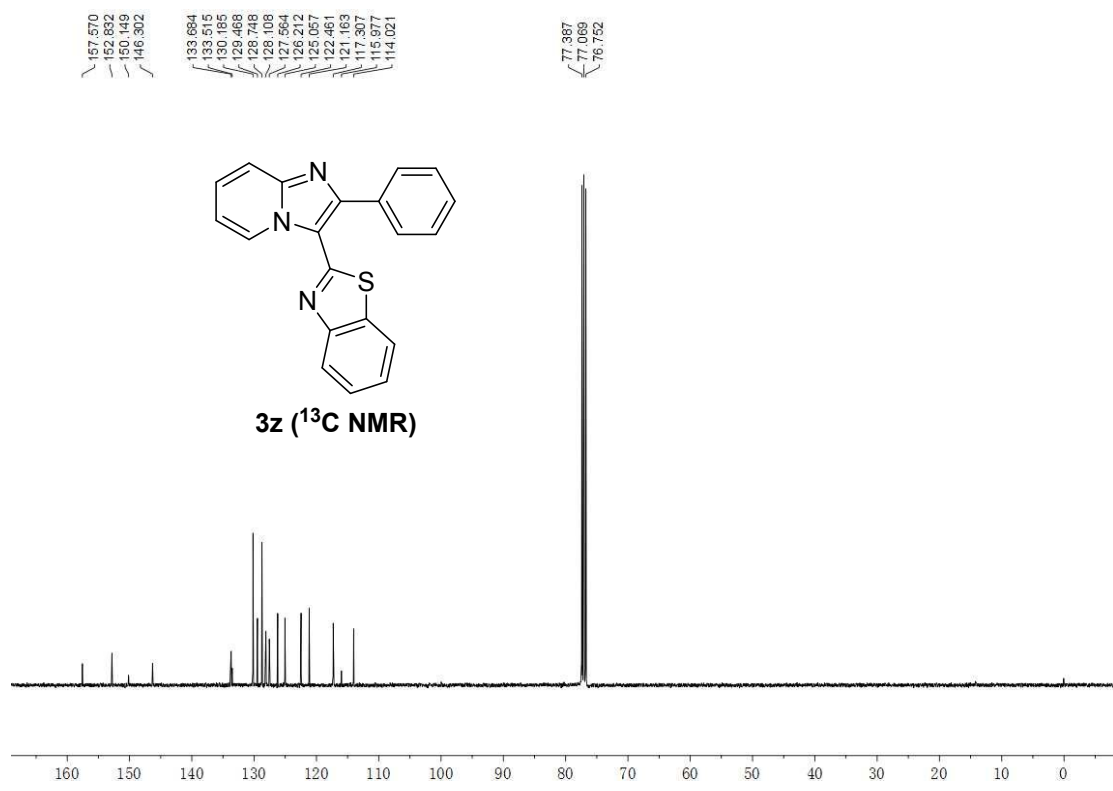

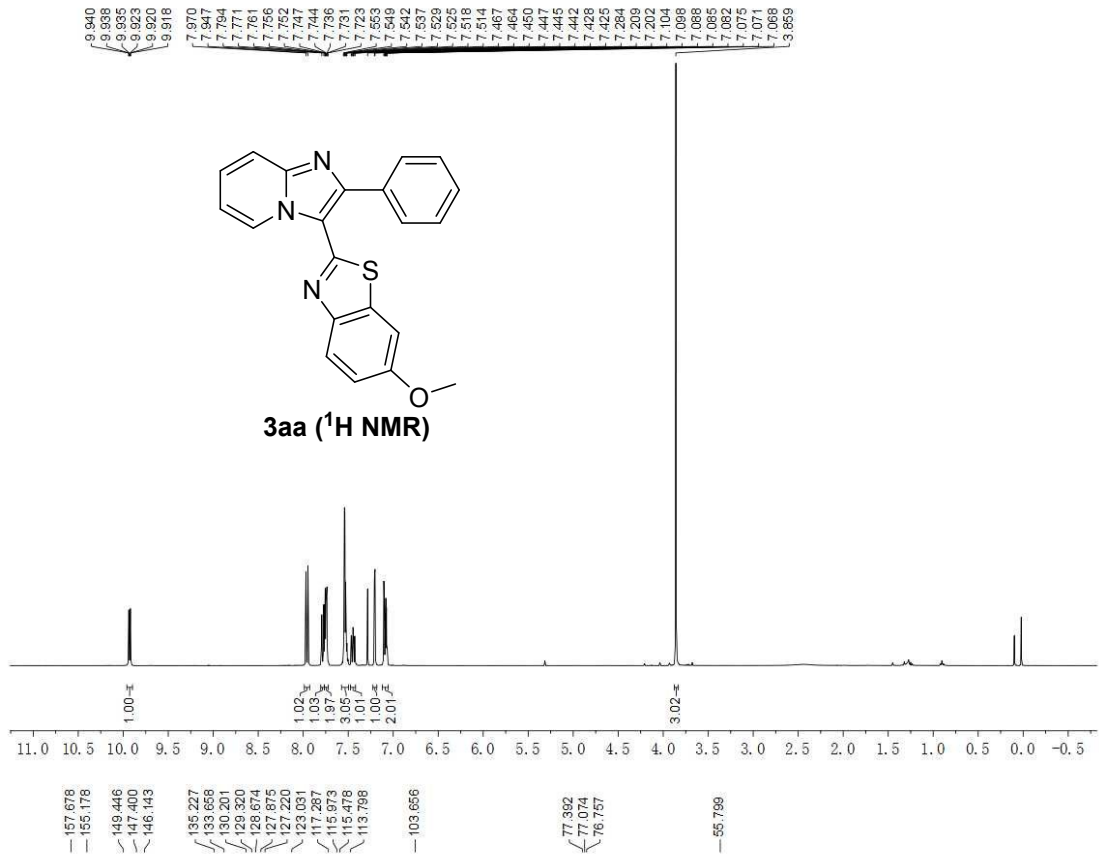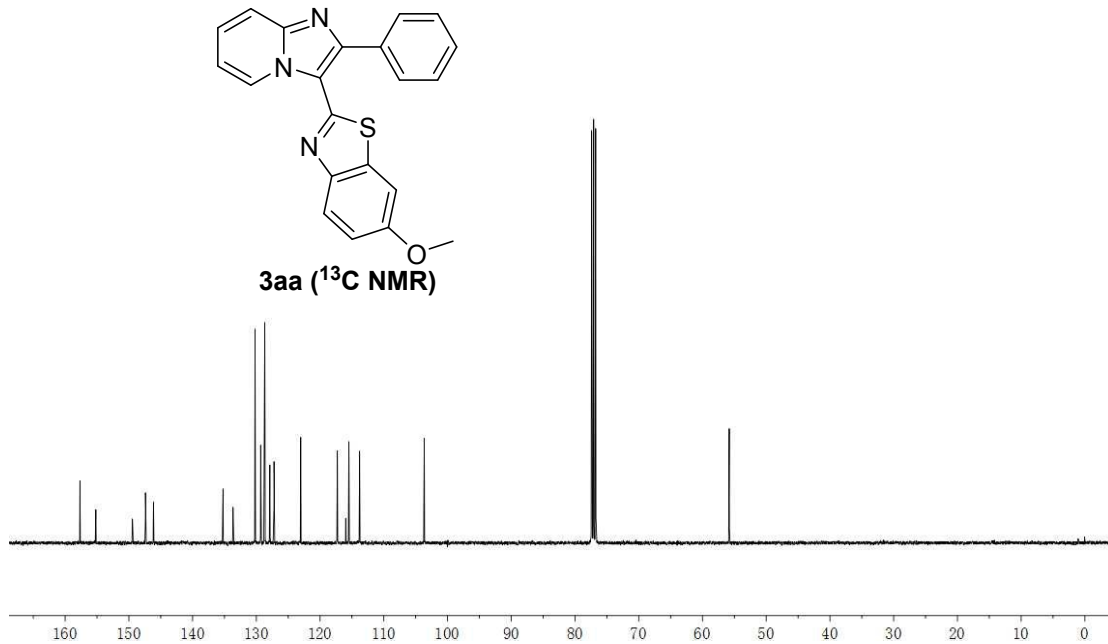

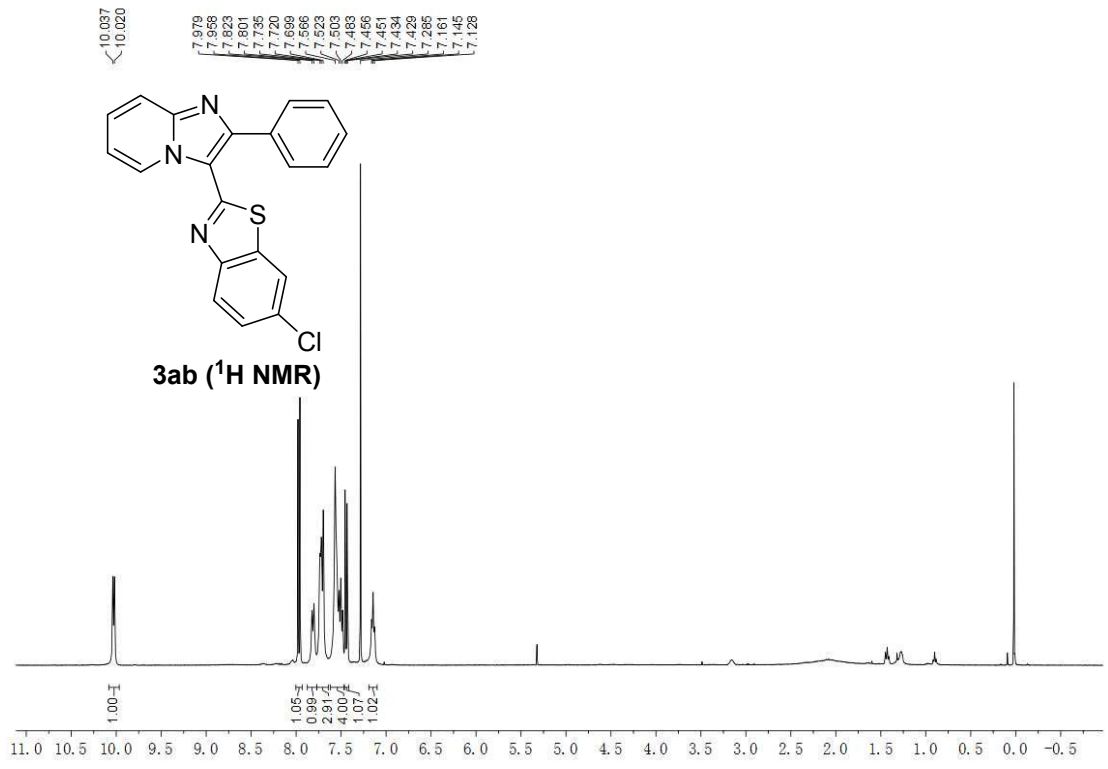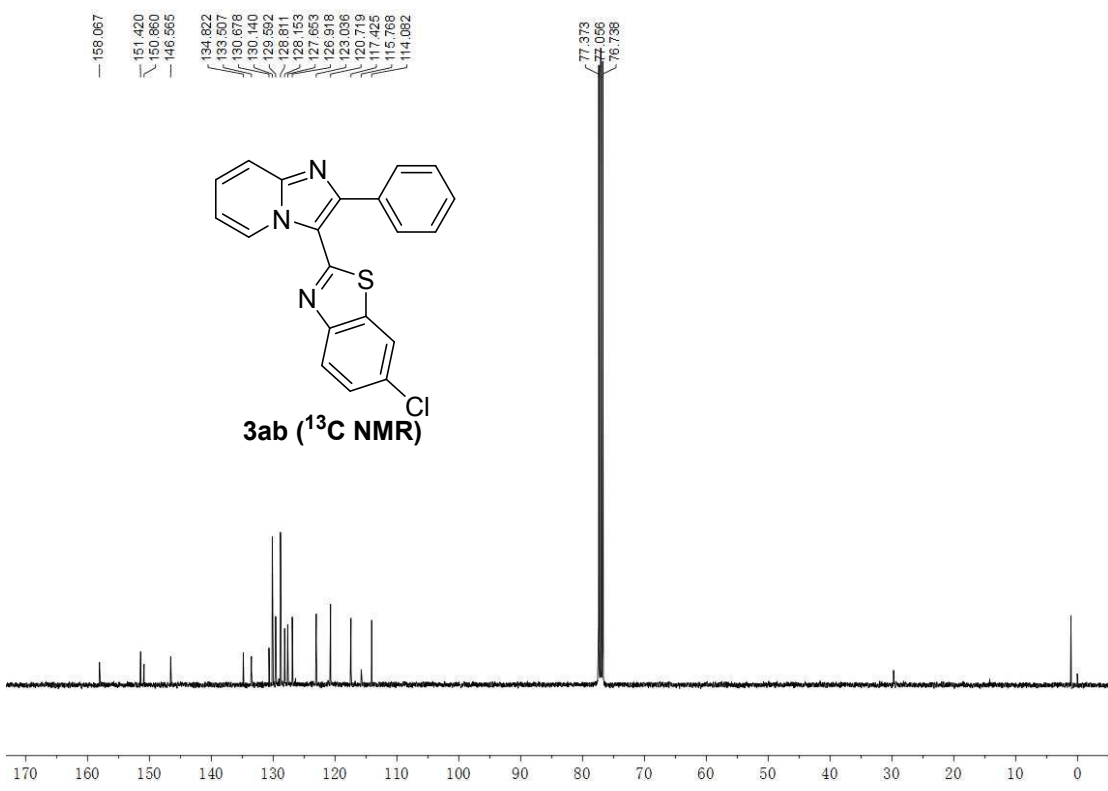

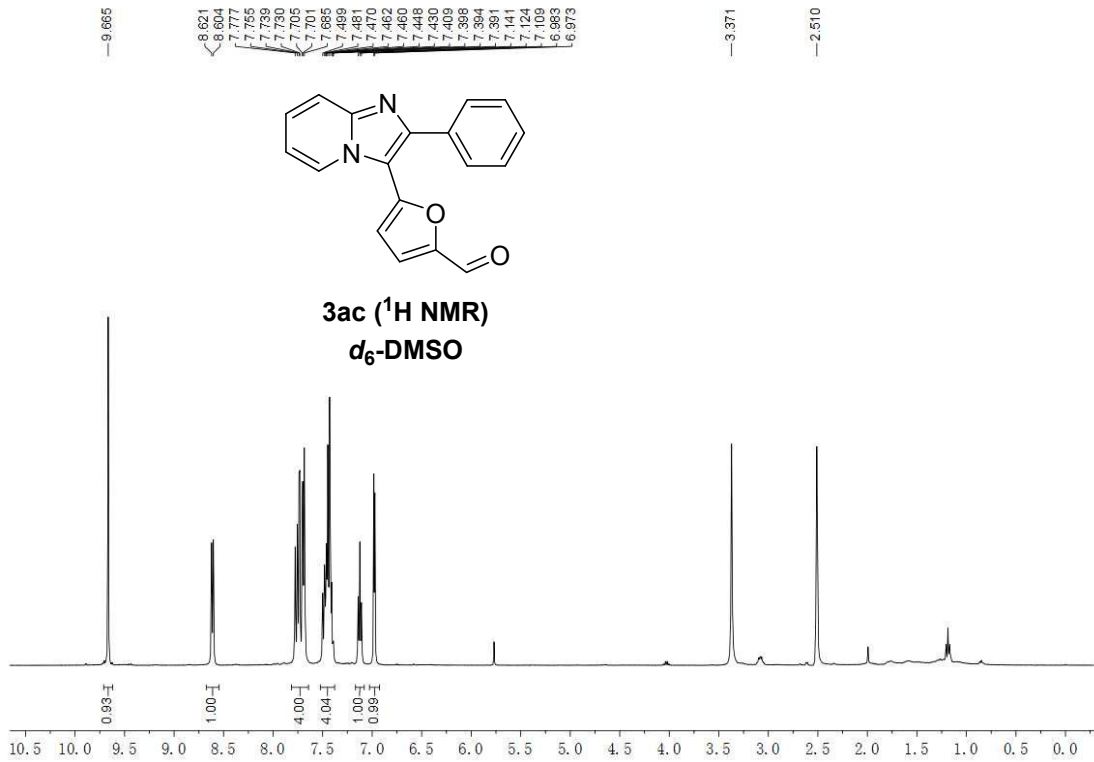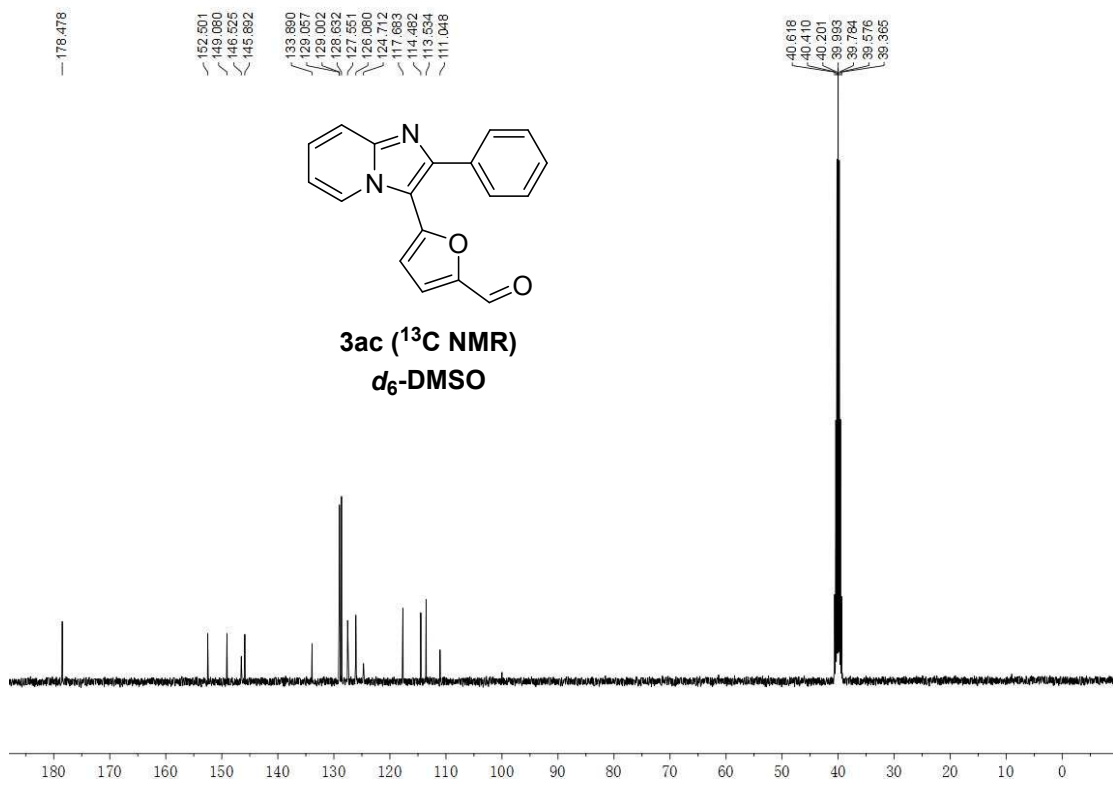

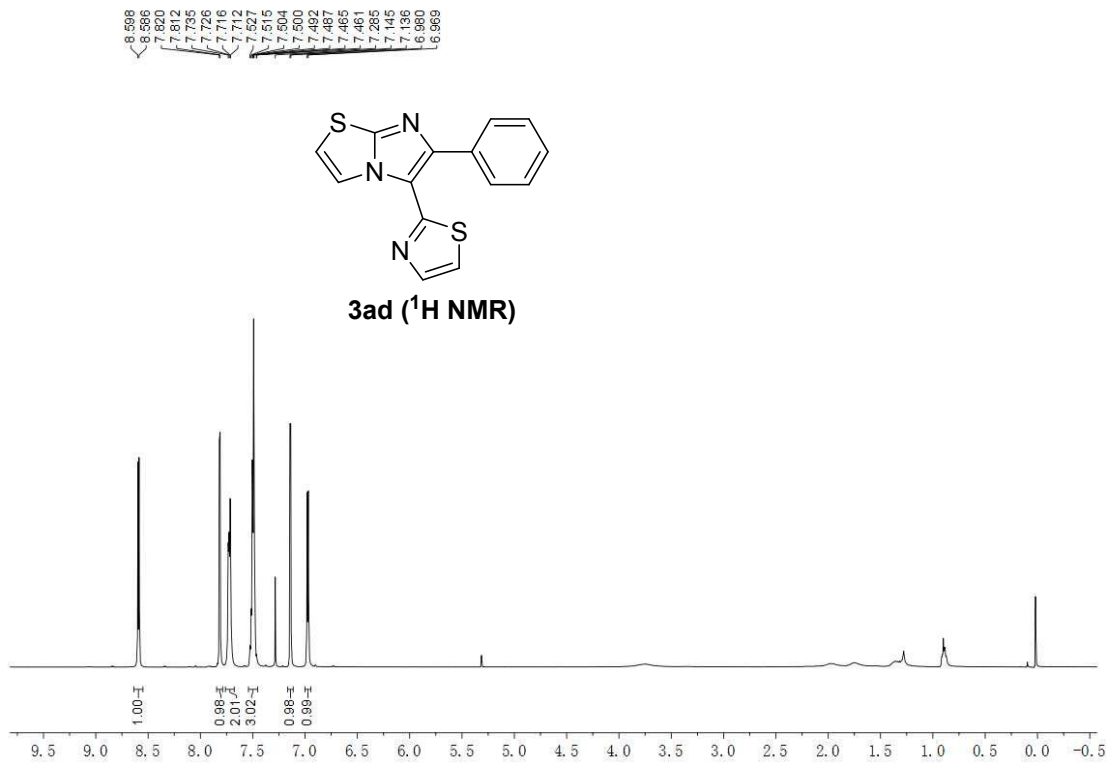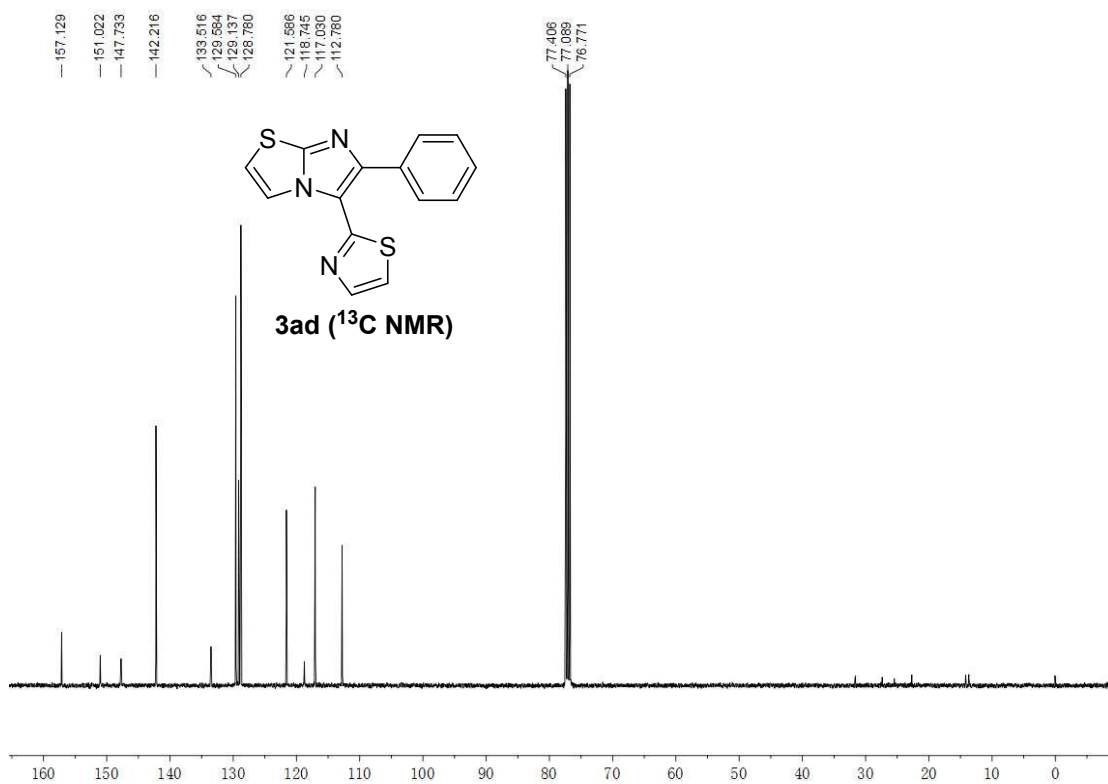

10.042  
10.037  
10.025  
10.020

8.727  
8.722  
8.716  
8.711  
7.922  
7.913  
7.786  
7.779  
7.775  
7.771  
7.768  
7.765  
7.752  
7.528  
7.521  
7.512  
7.505  
7.285  
7.235  
7.247  
7.105  
7.084  
7.087  
7.077

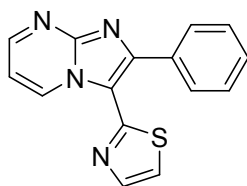

3ae (<sup>1</sup>H NMR)

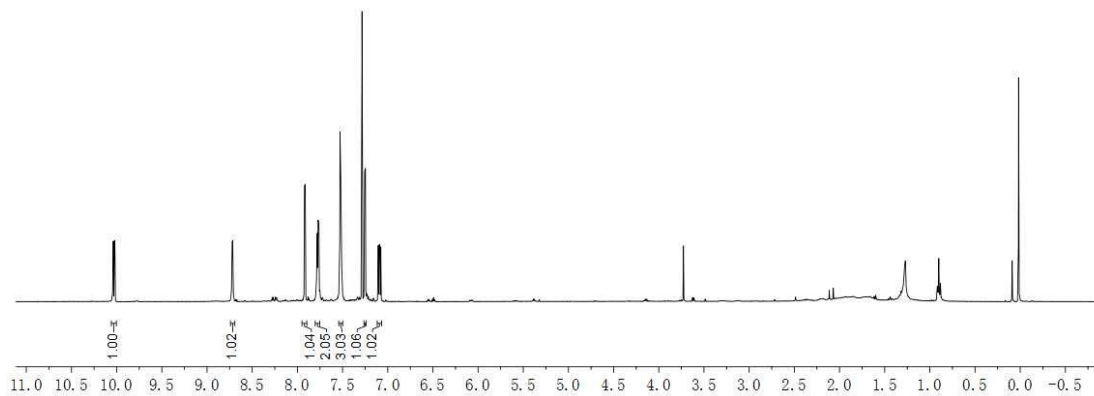

157.129  
151.365  
148.330  
148.537  
142.256  
135.176  
133.110  
129.914  
129.526  
128.769  
118.133  
114.387  
109.776  
77.362  
77.044  
76.727

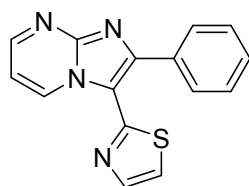

3ae (<sup>13</sup>C NMR)

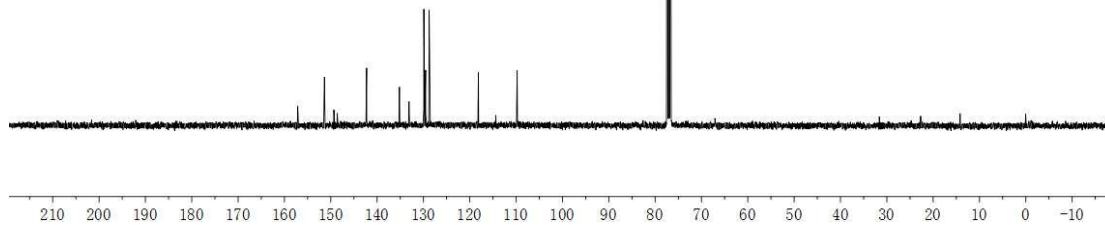

Supplement: c7ob00883j1.pdf [file c7ob00883j1.pdf]
